# Fish Predation by Semi-Aquatic Spiders: A Global Pattern

Martin Nyffeler<sup>1\*</sup>, Bradley J. Pusey<sup>2</sup>

<sup>1</sup> Section of Conservation Biology, Department of Environmental Sciences, University of Basel, Basel, Switzerland, <sup>2</sup> Centre for Excellence in Natural Resource Management, The University of Western Australia, Albany, Australia

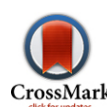

## Abstract

More than 80 incidences of fish predation by semi-aquatic spiders – observed at the fringes of shallow freshwater streams, rivers, lakes, ponds, swamps, and fens – are reviewed. We provide evidence that fish predation by semi-aquatic spiders is geographically widespread, occurring on all continents except Antarctica. Fish predation by spiders appears to be more common in warmer areas between 40° S and 40° N. The fish captured by spiders, usually ranging from 2–6 cm in length, are among the most common fish taxa occurring in their respective geographic area (e.g., mosquitofish [*Gambusia* spp.] in the southeastern USA, fish of the order Characiformes in the Neotropics, killifish [*Aphyosemion* spp.] in Central and West Africa, as well as Australian native fish of the genera *Galaxias*, *Melanotaenia*, and *Pseudomugil*). Naturally occurring fish predation has been witnessed in more than a dozen spider species from the superfamily Lycosoidea (families Pisauridae, Trechaleidae, and Lycosidae), in two species of the superfamily Ctenoidea (family Ctenidae), and in one species of the superfamily Corinnoidea (family Liocranidae). The majority of reports on fish predation by spiders referred to pisaurid spiders of the genera *Dolomedes* and *Nilus* (>75% of observed incidences). There is laboratory evidence that spiders from several more families (e.g., the water spider *Argyroneta aquatica* [Cybaeidae], the intertidal spider *Desis marina* [Desidae], and the ‘swimming’ huntsman spider *Heteropoda natans* [Sparassidae]) predate fish as well. Our finding of such a large diversity of spider families being engaged in fish predation is novel. Semi-aquatic spiders captured fish whose body length exceeded the spiders’ body length (the captured fish being, on average, 2.2 times as long as the spiders). Evidence suggests that fish prey might be an occasional prey item of substantial nutritional importance.

**Citation:** Nyffeler M, Pusey BJ (2014) Fish Predation by Semi-Aquatic Spiders: A Global Pattern. PLoS ONE 9(6): e99459. doi:10.1371/journal.pone.0099459

**Editor:** Trine Bilde, Aarhus University, Denmark

**Received:** December 2, 2013; **Accepted:** May 14, 2014; **Published:** June 18, 2014

**Copyright:** © 2014 Nyffeler, Pusey. This is an open-access article distributed under the terms of the Creative Commons Attribution License, which permits unrestricted use, distribution, and reproduction in any medium, provided the original author and source are credited.

**Funding:** The authors have no funding or support to report.

**Competing Interests:** The authors have declared that no competing interests exist.

\* E-mail: martin.nyffeler@unibas.ch

## Introduction

A diverse array of predators feed on fish, including piscivorous fish, birds (e.g., egrets, herons, cormorants, gulls, osprey, kites, eagles), fish-eating bats, otters, bears, snakes, certain turtles, etc. [1–5]. Predation by a few large arthropods, that spend all, or at least part, of their life cycle in the aquatic environment and are generally well-adapted at catching aquatic prey such as small fish, tadpoles, frogs, etc., has also been documented [6–7]. For example, water scorpions (Nepidae), giant water-bugs (Belostomatidae), backswimmers (Notonectidae), and water boatmen (Corixidae) are known to kill and eat small fish [7]. A caddisfly species, *Plectrocnemia conspersa* (Polycentropodidae), has been observed preying on fish fry [6], and nymphs of the dragonfly *Cordulegaster dorsalis* (Cordulegastridae) have been reported to kill fish of > 2.5 cm in length [7]. Furthermore, diving beetles (Dytiscidae) and scavenger water beetles (Hydrophilidae) often predate small fish [7], highlighting the plethora of predatory arthropods with trophic interactions with freshwater fish.

Another group of predaceous arthropods known to catch and eat small fish is spiders, particularly large, semi-aquatic pisaurid spiders of the genera *Dolomedes* and *Nilus* (‘fishing spiders’). The notion of fish-catching spiders is rather peculiar if we consider that spiders, as a whole, are traditionally viewed as the classic example of a predator that feeds on insects, yet some spiders are well-adapted for life near, or on, the water surface [8]. Despite the widespread assumption of spiders primarily being insectivores,

piscivory is not altogether surprising considering that a number of spiders (e.g., Araneidae, Nephilidae, Pisauridae, Sparassidae, Theraphosidae, and Theridiidae) occasionally supplement their arthropod diet with small vertebrates including frogs, toads, salamanders, lizards, snakes, mice, rats, bats, and birds [7,9–10] and many spiders may be found at the land-water interface. Photographic evidence supporting the existence of fish-catching by ‘fishing spiders’ has been published [11–13] but published accounts of open-field assessment of fish predation are often anecdotal, from very old literature sources and originate from only few locations [14–19]. Additionally, the majority of published photographic sources depict spiders preying upon fish in captivity [11–13]. More recently, evidence of the extent of fish predation by spiders in laboratory [20–24] and field experiments [25], suggests it is more widespread than traditionally thought. However, the propensity for spiders to feed on fish and the importance of this trophic relationship under natural conditions remains unclear. We conducted a global analysis of all available literature on fish predation by spiders and unpublished information from biologists and naturalists (arachnologists, ichthyologists, aquatic ecologists, photographers, etc.) to provide a broad, conceptual framework for this trophic relationship placed within the context of spider behavior and nutritional ecology.

**Table 1.** Reports of fish predation by spiders under natural conditions in the field, based upon published literature and unpublished data (File S1 provides detailed documentation of all predation events).

| Predator (spider taxon)        |             | Prey (fish taxon)         |                             | Estimated total length of fish (cm) | Estimated fish length/spider length ratio | Type of evidence      | Country                                         | Source                                                                                                                                                                | report # |
|--------------------------------|-------------|---------------------------|-----------------------------|-------------------------------------|-------------------------------------------|-----------------------|-------------------------------------------------|-----------------------------------------------------------------------------------------------------------------------------------------------------------------------|----------|
| Species                        | Family      | Species                   | Family                      |                                     |                                           |                       |                                                 |                                                                                                                                                                       |          |
| <i>Agroeca lusatica</i>        | Liocranidae | 'Trout' (fry)             | Salmonidae                  | 2                                   | 2.8                                       | Direct observation    | France                                          | [165]                                                                                                                                                                 | 86       |
| <i>Ancylometes bogotensis</i>  | Ctenidae    | Unidentified              | Poeciliidae                 | N/A                                 | N/A                                       | Photo                 | Costa Rica                                      | [166]                                                                                                                                                                 | 47       |
| <i>Ancylometes rufus</i>       | Ctenidae    | Unidentified              | Unidentified                | N/A                                 | N/A                                       | Direct observation    | Brazil                                          | [35]                                                                                                                                                                  | 58       |
| <i>Ancylometes</i> sp.         | Ctenidae    | <i>Cyphocharax</i> sp.    | Curimatidae (Characiformes) | 6                                   | 2.4                                       | Photo                 | Ecuador                                         | Ed Germain, pers. comm.                                                                                                                                               | 52       |
| <i>Ancylometes</i> sp.         | Ctenidae    | Unidentified              | Characiformes               | N/A                                 | N/A                                       | Photo                 | Ecuador                                         | Tim Wohlberg, pers. comm. <a href="http://zufalladventures.com/">http://zufalladventures.com/</a>                                                                     | 53       |
| <i>Ancylometes</i> sp.         | Ctenidae    | Unidentified              | Characiformes               | N/A                                 | N/A                                       | Photo                 | Ecuador                                         | Cleatus Cobb, flickr website                                                                                                                                          | 54       |
| <i>Ancylometes</i> sp.         | Ctenidae    | Unidentified              | Characiformes               | N/A                                 | N/A                                       | Photo                 | Ecuador                                         | <a href="http://alexisouthamerica.blogspot.ch">http://alexisouthamerica.blogspot.ch</a>                                                                               | 55       |
| <i>Ancylometes</i> sp.?        | Ctenidae    | Unidentified              | Unidentified                | N/A                                 | N/A                                       | Direction observation | Ecuador                                         | <a href="http://www.tripadvisor.de">http://www.tripadvisor.de</a>                                                                                                     | 56       |
| <i>Ancylometes</i> sp.         | Ctenidae    | Unidentified              | Characiformes               | ~7–8                                | 2.7                                       | Photo                 | Peru                                            | <a href="http://thinkjungle.com/amazon-rainforest-life/amazon-rainforest-carnivores/">http://thinkjungle.com/amazon-rainforest-life/amazon-rainforest-carnivores/</a> | 60       |
| <i>Dolomedes facetus</i>       | Pisauridae  | <i>Carassius auratus</i>  | Cyprinidae                  | 9                                   | 3.7                                       | Photo                 | Australia (Sydney)                              | [19]                                                                                                                                                                  | 64       |
| <i>Dolomedes facetus</i>       | Pisauridae  | <i>Xiphophorus</i> sp.    | Poeciliidae                 | 5.5                                 | 2.2                                       | Photo                 | Australia (Brisbane area)                       | Peter Liley, pers. comm.                                                                                                                                              | 67       |
| <i>Dolomedes facetus</i>       | Pisauridae  | Unidentified              | Unidentified                | N/A                                 | N/A                                       | Direct observation    | Australia (Audley, NSW)                         | [19]                                                                                                                                                                  | 63       |
| <i>Dolomedes facetus</i>       | Pisauridae  | Unidentified              | Unidentified                | N/A                                 | N/A                                       | Photo                 | Australia                                       | Jean-Paul Ferrero, ardeaprints.com                                                                                                                                    | 70       |
| <i>Dolomedes mizhoanus</i>     | Pisauridae  | Unidentified              | Unidentified                | N/A                                 | N/A                                       | Direct observation    | China                                           | [105]                                                                                                                                                                 | 77       |
| <i>Dolomedes okefinokensis</i> | Pisauridae  | <i>Gambusia holbrooki</i> | Poeciliidae                 | 4                                   | 1.8                                       | Photo                 | USA (Florida, Big Cypress National Preserve)    | Misti Little, pers. comm.                                                                                                                                             | 28       |
| <i>Dolomedes okefinokensis</i> | Pisauridae  | <i>Gambusia affinis</i>   | Poeciliidae                 | 2.5                                 | 1.0                                       | Direct observation    | USA (Florida, near Lake Washington)/Incidence 1 | [121] (ID of spider changed by Carico [29])                                                                                                                           | 21       |
| <i>Dolomedes okefinokensis</i> | Pisauridae  | <i>Gambusia affinis</i>   | Poeciliidae                 | 2.5                                 | 1.0                                       | Direct observation    | USA (Florida/near Lake Washington)/Incidence 2  | [121] (ID of spider changed by Carico [29])                                                                                                                           | 22       |
| <i>Dolomedes okefinokensis</i> | Pisauridae  | <i>Gambusia affinis</i>   | Poeciliidae                 | 2.5                                 | 1.0                                       | Direct observation    | USA (Florida/near Lake Washington)/Incidence 3  | [121] (ID of spider changed by Carico [29])                                                                                                                           | 23       |
| <i>Dolomedes plantarius</i>    | Pisauridae  | <i>Gambusia holbrooki</i> | Poeciliidae                 | N/A                                 | N/A                                       | Direct observation    | Italy                                           | Emanuele Biggi, pers. comm.                                                                                                                                           | 85       |
| <i>Dolomedes plantarius</i>    | Pisauridae  | <i>Pungitius laevis</i>   | Gasterosteidae              | N/A                                 | N/A                                       | Photo                 | UK/Incidence 1                                  | Helen Smith, pers. comm.                                                                                                                                              | 87       |

Table 1. Cont.

| Predator (spider taxon)      | Prey (fish taxon) |                                        | Estimated total length of fish (cm) | Estimated fish length/spider length ratio | Type of evidence   | Country                                     | Source                                                                                                                    | report # |
|------------------------------|-------------------|----------------------------------------|-------------------------------------|-------------------------------------------|--------------------|---------------------------------------------|---------------------------------------------------------------------------------------------------------------------------|----------|
| Species                      | Family            | Species                                | Family                              |                                           |                    |                                             |                                                                                                                           |          |
| <i>Dolomedes plantarius</i>  | Pisauridae        | <i>Pungitius laevis</i>                | Gasterosteidae                      | N/A                                       | Direct observation | UK/Incidence 2                              | Helen Smith, pers. comm.                                                                                                  | 88       |
| <i>Dolomedes raptor</i>      | Pisauridae        | Unidentified                           | Infraclass Teleostei                | 5.5                                       | Photo              | Taiwan                                      | I-Min To, pers. comm.                                                                                                     | 74       |
| <i>Dolomedes saganus</i>     | Pisauridae        | <i>Oryzias latipes</i>                 | Adrianichthyidae                    | 4.3                                       | Direct observation | Hong Kong                                   | [167]                                                                                                                     | 75       |
| <i>Dolomedes saganus</i>     | Pisauridae        | <i>Pseudorasbora parva</i>             | Cyprinidae                          | 3.3                                       | Direct observation | Japan                                       | [168]                                                                                                                     | 73       |
| <i>Dolomedes scriptus</i>    | Pisauridae        | 'Darter'                               | Percidae                            | N/A                                       | Direct observation | USA (unspecified location)                  | [29]                                                                                                                      | 44       |
| <i>Dolomedes scriptus</i>    | Pisauridae        | <i>Lepomis cyanellus</i>               | Centrarchidae                       | 5.5                                       | Photo              | Canada (Ontario)                            | Lloyd Alter, pers. comm.                                                                                                  | 46       |
| <i>Dolomedes scriptus</i>    | Pisauridae        | Unidentified                           | Infraclass Teleostei                | N/A                                       | Photo              | USA (unspecified location)                  | <a href="http://www.flickr.com/photos/44608110@N06/4114197379/">http://www.flickr.com/photos/44608110@N06/4114197379/</a> | 45       |
| <i>Dolomedes scriptus</i>    | Pisauridae        | 'Minnow'                               | Cyprinidae                          | N/A                                       | Photo              | USA (Michigan)                              | [169]                                                                                                                     | 41       |
| <i>Dolomedes tenebrosus?</i> | Pisauridae        | <i>Notemigonus crysoleucas</i>         | Cyprinidae                          | N/A                                       | Photo              | USA (Maine)                                 | Jeffrey Hollis, pers. comm.                                                                                               | 40       |
| <i>Dolomedes tenebrosus</i>  | Pisauridae        | <i>Semotilus atromaculatus</i>         | Cyprinidae                          | 6.5                                       | Photo              | USA (Kentucky)                              | Jason Butler, pers. comm.                                                                                                 | 33       |
| <i>Dolomedes triton</i>      | Pisauridae        | <i>Carassius auratus</i>               | Cyprinidae                          | 5                                         | Photo              | USA (Texas)                                 | Leslie Todd, flickr website                                                                                               | 11       |
| <i>Dolomedes triton</i>      | Pisauridae        | <i>Gambusia holbrooki</i>              | Poeciliidae                         | 4.5                                       | Photo              | USA (Florida, Lady Lake)                    | Machele White, pers. comm.                                                                                                | 20       |
| <i>Dolomedes triton</i>      | Pisauridae        | <i>Gambusia</i> sp.                    | Poeciliidae                         | N/A                                       | Photo              | USA (Florida, near Tampa)                   | Stacy Cyrus, DavesGarden website                                                                                          | 24       |
| <i>Dolomedes triton?</i>     | Pisauridae        | <i>Gambusia affinis</i>                | Poeciliidae                         | N/A                                       | Photo              | USA (Florida, Washington County)            | Paul Moler, pers. comm.                                                                                                   | 17       |
| <i>Dolomedes triton</i>      | Pisauridae        | <i>Gambusia affinis</i>                | Poeciliidae                         | N/A                                       | Unknown            | USA (Mississippi)                           | [170]                                                                                                                     | 15       |
| <i>Dolomedes triton</i>      | Pisauridae        | <i>Gambusia holbrooki</i>              | Poeciliidae                         | 5                                         | Photo              | USA (North Carolina)                        | Patrick Randall, pers. comm.                                                                                              | 30       |
| <i>Dolomedes triton</i>      | Pisauridae        | <i>Gila dilaenia</i>                   | Cyprinidae                          | N/A                                       | Photo              | USA (Arizona)                               | Andreas Kettenburg, pers. comm.                                                                                           | 9        |
| <i>Dolomedes triton</i>      | Pisauridae        | <i>Fundulus chrysotus</i>              | Fundulidae                          | 3                                         | Photo              | USA (Texas)                                 | Richard Dashnau, pers. comm.                                                                                              | 10       |
| <i>Dolomedes triton</i>      | Pisauridae        | <i>Heterandria formosa</i>             | Poeciliidae                         | N/A                                       | Photo              | USA (Florida, Tsala Apopka Lake)            | Claire Sunquist-Blunden, pers. comm.                                                                                      | 19       |
| <i>Dolomedes triton</i>      | Pisauridae        | <i>Ictalurus punctatus</i> (fingering) | Ictaluridae                         | ≤6                                        | Direct observation | USA (Oklahoma)                              | [131]                                                                                                                     | 12       |
| <i>Dolomedes triton</i>      | Pisauridae        | Unidentified                           | Unidentified                        | N/A                                       | Direct observation | USA (Florida, Highlands Hammock State Park) | Brian Kenney, pers. comm.                                                                                                 | 25       |
| <i>Dolomedes triton</i>      | Pisauridae        | Unidentified                           | Unidentified                        | N/A                                       | Direct observation | USA (Florida, near Bradenton)               | Brian Kenney, pers. comm.                                                                                                 | 26       |
| <i>Dolomedes triton</i>      | Pisauridae        | Unidentified                           | Unidentified                        | N/A                                       | Direct observation | USA (Florida, near Venice)                  | Brian Kenney, pers. comm.                                                                                                 | 27       |

Table 1. Cont.

| Predator (spider taxon)                    |            | Prey (fish taxon)          |               | Estimated total length of fish (cm) |     | Estimated fish length/spider length ratio |                                   | Type of evidence          | Country | Source | report # |
|--------------------------------------------|------------|----------------------------|---------------|-------------------------------------|-----|-------------------------------------------|-----------------------------------|---------------------------|---------|--------|----------|
| Species                                    | Family     | Species                    | Family        |                                     |     |                                           |                                   |                           |         |        |          |
| <i>Dolomedes triton</i>                    | Pisauridae | Unidentified               | Unidentified  | 2.5                                 | 1.3 | Direct observation                        | USA (New York)                    | [171] (ID by Carico [29]) |         |        | 39       |
| <i>Dolomedes vittatus</i>                  | Pisauridae | Unidentified               | Fundulidae?   | 5.5                                 | 2.5 | Photo                                     | USA (unspecified location)        | [172]                     |         |        | 43       |
| <i>Dolomedes</i> sp.                       | Pisauridae | <i>Carassius auratus</i>   | Cyprinidae    | 7                                   | 3.0 | Direct observation                        | Australia (Adelaide)/ Incidence 1 | [19]                      |         |        | 61       |
| <i>Dolomedes</i> sp.                       | Pisauridae | <i>Carassius auratus</i>   | Cyprinidae    | 7.5                                 | 3.0 | Photo                                     | Australia (Adelaide)/ Incidence 2 | [19]                      |         |        | 62       |
| <i>Dolomedes</i> sp.                       | Pisauridae | <i>Carassius auratus</i>   | Cyprinidae    | 2.5                                 | 1.0 | Direct observation                        | Australia (Lismore)               | [19]                      |         |        | 65       |
| <i>Dolomedes</i> sp.                       | Pisauridae | <i>Elassoma zonatum</i>    | Elassomatidae | 3.5                                 | 1.8 | Direct observation                        | USA (California)/ Incidence 1     | [18,173]                  |         |        | 1        |
| <i>Dolomedes</i> sp.                       | Pisauridae | <i>Elassoma zonatum</i>    | Elassomatidae | 3.5                                 | 1.8 | Direct observation                        | USA (California)/ Incidence 2     | [18,173]                  |         |        | 2        |
| <i>Dolomedes</i> sp.                       | Pisauridae | <i>Elassoma zonatum</i>    | Elassomatidae | 3.5                                 | 1.8 | Direct observation                        | USA (California)/ Incidence 3     | [18,173]                  |         |        | 3        |
| <i>Dolomedes</i> sp.                       | Pisauridae | <i>Elassoma zonatum</i>    | Elassomatidae | 3.5                                 | 1.8 | Direct observation                        | USA (California)/ Incidence 4     | [18,173]                  |         |        | 4        |
| <i>Dolomedes</i> sp.                       | Pisauridae | <i>Elassoma zonatum</i>    | Elassomatidae | 3.5                                 | 1.8 | Direct observation                        | USA (California)/ Incidence 5     | [18,173]                  |         |        | 5        |
| <i>Dolomedes</i> sp.                       | Pisauridae | <i>Elassoma zonatum</i>    | Elassomatidae | 3.5                                 | 1.8 | Direct observation                        | USA (California)/ Incidence 6     | [18,173]                  |         |        | 6        |
| <i>Dolomedes</i> sp.                       | Pisauridae | <i>Elassoma zonatum</i>    | Elassomatidae | 3.5                                 | 1.8 | Direct observation                        | USA (California)/ Incidence 7     | [18,173]                  |         |        | 7        |
| <i>Dolomedes</i> sp.                       | Pisauridae | <i>Elassoma zonatum</i>    | Elassomatidae | 3.5                                 | 1.8 | Direct observation                        | USA (California)/ Incidence 8     | [18,173]                  |         |        | 8        |
| <i>Dolomedes</i> sp. (not <i>facetus</i> ) | Pisauridae | <i>Galaxias olidus</i>     | Galaxiidae    | 7.5                                 | 3.4 | Photo                                     | Australia (Goomburra)             | Loren Jarvis, pers. comm. |         |        | 66       |
| <i>Dolomedes</i> sp.                       | Pisauridae | <i>Gambusia affinis</i>    | Poeciliidae   | N/A                                 | N/A | Direct observation                        | USA (Kentucky)                    | [156]                     |         |        | 35       |
| <i>Dolomedes</i> sp.                       | Pisauridae | <i>Gambusia affinis</i>    | Poeciliidae   | N/A                                 | N/A | Direct observation                        | USA (Kentucky)                    | Jason Butler, pers. comm. |         |        | 34       |
| <i>Dolomedes</i> sp.                       | Pisauridae | <i>Gambusia affinis</i>    | Poeciliidae   | N/A                                 | N/A | Direct observation                        | USA (Louisiana)                   | [131]                     |         |        | 13       |
| <i>Dolomedes</i> sp.                       | Pisauridae | <i>Lepomis macrochirus</i> | Centrarchidae | N/A                                 | N/A | Direct observation                        | USA (Louisiana)                   | [131]                     |         |        | 14       |
| <i>Dolomedes</i> sp.                       | Pisauridae | 'Minnow'                   | Cyprinidae    | 7.6                                 | 3.8 | Direct observation                        | USA (Alabama)                     | [15]                      |         |        | 16       |

Table 1. Cont.

| Predator (spider taxon)       |               | Prey (fish taxon)                       |                                        | Estimated total length of fish (cm) | Estimated fish length/spider length ratio | Type of evidence   | Country                         | Source                                 | report # |
|-------------------------------|---------------|-----------------------------------------|----------------------------------------|-------------------------------------|-------------------------------------------|--------------------|---------------------------------|----------------------------------------|----------|
| Species                       | Family        | Species                                 | Family                                 |                                     |                                           |                    |                                 |                                        |          |
| <i>Dolomedes</i> sp.          | Pisauridae    | 'Minnow'                                | Cyprinidae                             | 3.2                                 | 1.6                                       | Photo              | USA (Georgia)                   | [18]                                   | 29       |
| <i>Dolomedes</i> sp.          | Pisauridae    | 'Minnow'                                | Cyprinidae                             | 8.3                                 | 4.1                                       | Direct observation | USA (New Jersey)                | [15]                                   | 36       |
| <i>Dolomedes</i> sp.          | Pisauridae    | <i>Oncorhynchus mykiss</i> (fry)        | Salmonidae                             | N/A                                 | N/A                                       | Direct observation | USA (Tennessee)                 | [17]                                   | 32       |
| <i>Dolomedes</i> sp.          | Pisauridae    | <i>Oncorhynchus mykiss</i> (fingerling) | Salmonidae                             | 5.7                                 | 3.0                                       | Direct observation | USA (Tennessee)                 | [17]                                   | 31       |
| <i>Dolomedes</i> sp.          | Pisauridae    | Unidentified                            | Centrarchidae                          | 5                                   | 2.5                                       | Direct observation | USA (Pennsylvania)/ Incidence 1 | [15]                                   | 37       |
| <i>Dolomedes</i> sp.          | Pisauridae    | Unidentified                            | Centrarchidae                          | 5                                   | 2.5                                       | Direct observation | USA (Pennsylvania)/ Incidence 2 | [15]                                   | 38       |
| <i>Dolomedes</i> sp.          | Pisauridae    | Unidentified                            | Unidentified                           | N/A                                 | N/A                                       | Direct observation | USA (northern Florida)          | Paul Moler, pers. comm.                | 18       |
| <i>Dolomedes</i> sp.          | Pisauridae    | <i>Micropterus dolomieu</i>             | Centrarchidae                          | 4.5                                 | 2.0                                       | Photo              | USA (Wisconsin)                 | Tod Lewis, pers. comm.                 | 42       |
| <i>Nilus curtus</i>           | Pisauridae    | Unidentified                            | Unidentified                           | probably >4                         | 2.0                                       | Direct observation | South Africa                    | Astri Leroy, pers. comm.               | 79       |
| <i>Nilus massajae</i>         | Pisauridae    | Unidentified                            | Unidentified                           | 4                                   | 1.7                                       | Photo              | Zimbabwe                        | Marcelo de Freitas, pers. comm.        | 81       |
| <i>Nilus</i> sp.              | Pisauridae    | <i>Aphyosemion</i> sp.                  | Nothobranchiidae                       | 4.5                                 | 2.2                                       | Photo              | Cameroon                        | Duncan Reid, pers. comm.               | 82       |
| <i>Nilus</i> sp.              | Pisauridae    | <i>Aphyosemion walker</i>               | Nothobranchiidae                       | 3                                   | 1.5                                       | Photo              | Ivory Coast/Incidence 1         | [174]                                  | 83       |
| <i>Nilus</i> sp.              | Pisauridae    | <i>Aphyosemion walker</i>               | Nothobranchiidae                       | N/A                                 | N/A                                       | Direct observation | Ivory Coast/other incidences    | [174]                                  | 84       |
| <i>Nilus</i> sp.              | Pisauridae    | 'Trout' (fry)                           | Salmonidae                             | N/A                                 | N/A                                       | Direct observation | South Africa                    | [14]                                   | 80       |
| <i>Pardosa pseudoannulata</i> | Lycosidae     | <i>Elassoma zonatum</i>                 | Elassomatidae                          | 1.9                                 | 1.9                                       | Direct observation | India                           | [82]                                   | 78       |
| <i>Trechalea</i> sp.          | Trechaleidae  | Unidentified                            | Characiformes                          | N/A                                 | 1.8                                       | Photo              | Brazil                          | Jacques Jangoux, pers. comm.           | 59       |
| <i>Trechalea</i> sp.          | Trechaleidae  | Unidentified                            | Characiformes                          | N/A                                 | 1.9                                       | Photo              | Colombia                        | Juan Esteban Arias A., pers. comm.     | 50       |
| <i>Trechalea</i> sp.          | Trechaleidae  | Unidentified                            | Characiformes                          | N/A                                 | 2.2                                       | Photo              | Colombia                        | Solimary Garcia Hernandez, pers. comm. | 51       |
| <i>Trechalea</i> sp.          | Trechaleidae  | Unidentified                            | Characiformes                          | N/A                                 | 2.2                                       | Photo              | Panama                          | Jessica Stapley, pers. comm.           | 48       |
| Unidentified                  | Ctenidae      | Unidentified                            | Siluriformes (most likely Pimelodidae) | N/A                                 | N/A                                       | Photo              | Ecuador                         | Craig Harrison, travel blog/ ecuador   | 57       |
| Unidentified                  | Trechaleidae? | Unidentified                            | Characiformes                          | N/A                                 | N/A                                       | Direct observation | Panama                          | [17]                                   | 49       |

Table 1. Cont.

| Predator (spider taxon) |             | Prey (fish taxon)         |                 | Estimated total length of fish (cm) | Estimated fish length/spider length ratio | Type of evidence   | Country              | Source                       | report # |
|-------------------------|-------------|---------------------------|-----------------|-------------------------------------|-------------------------------------------|--------------------|----------------------|------------------------------|----------|
| Species                 | Family      | Species                   | Family          |                                     |                                           |                    |                      |                              |          |
| Unidentified            | Pisauridae  | <i>Cyprinus carpio</i>    | Cyprinidae      | 2                                   | 1.0                                       | Direct observation | Australia (Victoria) | Alison King, pers. comm.     | 89       |
| Unidentified            | Pisauridae  | <i>Melanotaenia</i> spp.  | Melanotaeniidae | N/A                                 | N/A                                       | Direct observation | Australia (Cairns)   | Bradley Pusey, pers. comm.   | 68       |
| Unidentified            | Pisauridae  | <i>Parazacco spilurus</i> | Cyprinidae      | 2.5                                 | N/A                                       | Direct observation | Hong Kong            | David Dudgeon, pers. comm.   | 76       |
| Unidentified            | Pisauridae  | <i>Pseudomugil</i> spp.   | Pseudomugilidae | N/A                                 | N/A                                       | Direct observation | Australia (Cairns)   | Bradley Pusey, pers. comm.   | 69       |
| Unidentified            | Pisauridae  | <i>Rasbora calliura</i>   | Cyprinidae      | 6                                   | 3.5                                       | Photo              | Borneo               | Michael Lo, pers. comm.      | 72       |
| Unidentified            | Pisauridae? | Unidentified              | Unidentified    | N/A                                 | N/A                                       | Direct observation | Australia            | Morsten 1835 (cited by [19]) | 71       |

doi:10.1371/journal.pone.0099459.t001

## Methods

An extensive bibliographic search was conducted to locate information concerning fish predation by spiders. The search was based largely on the Thomson-Reuters database (Web of Science), Google Scholar, Google Books, and ProQuest Dissertations & Theses. In addition, an internet search for information on this topic was conducted; authors of photographic material and reports on fish predation by spiders were contacted to obtain detailed information on these observations. Furthermore, inquiries among biologists were undertaken for unpublished reports on this topic. A total of 89 incidences of fish predation by spiders was gathered (Table 1). For the most part, only incidences of fish predation by free living spiders are listed in Table 1; however, a few incidences where semi-aquatic spiders killed fish in aquaria after wandering into buildings (not-staged situations; [15,18]) are included. Staged observations of captive spiders predating fish in aquaria, fish tanks, or garden pools are included in Tables 2 and 3. Forty-four (49%) of the incidences in Table 1 were previously reported in the scientific literature and 44% of observations included photographic documentation of predation.

Unpublished photographs of such events gained during the study were sent to ichthyologists and spider taxonomists for identification (see Acknowledgements for details). The resolution of a small number of the images was reduced sufficiently to result in uncertain identification beyond genus level but in most cases, identification to species level was considered appropriate. This is true for fish and spiders. Nomenclature of spiders follows Platnick [26]. Data on the live weight and size of spiders and fish were taken from the arachnological [11,13,17,19–20,22–25,27–43] and ichthyological [1,44–68] literature. Unless reported in the literature or by the respondents in our survey, the total lengths of the fish prey were estimated based on the photographs (see Table 1). The vast majority of reported spiders were adult pisaurids ~2–2.5 cm in length (cephalothorax plus abdomen; Table 2) and knowing their approximate body length, this was used as a standard (replacing a reference scale) to roughly estimate fish lengths. In cases where spider length remained doubtful (e.g., immature *Trechalea* spp.) no estimates of fish length were made. The estimates obtained in this manner were similar to those reported in the literature where the lengths of predated fish were measured in the laboratory indicating that our estimates are fairly accurate. Report numbers used in the tables refer to the respective detailed report description (see File S1).

## Results

### Geographic Distribution of Fish Predation by Spiders

Fish capture by spiders has been reported from all continents with the exception of Antarctica, where semi-aquatic spiders are absent ([26]; Fig. 1; Table 1). Approximately 90% of observed fish predation events were from regions of warmer climate between 40° S and 40° N (Fig. 1) and were typically observed at the margin of freshwater streams, rivers, creeks, bayous, lakes, ponds, swamps, and fens (see File S1).

Fish predation by spiders has been most frequently documented in North America, with 45 incidences from the USA (51% of the total; Figs. 2–3; Table 1; report # 1–45) with those concentrated in the east and southeast, particularly in Florida wetlands and neighbouring regions (Fig. 2). Elsewhere in North America, nine incidences of fish predation from the western USA are known to us (eight from California and one from Arizona; report # 1–9), two from the Midwest (one from Michigan and one from Wisconsin; report # 41–42) and a single observation from Canada of a semi-

**Table 2.** Fresh weight and body length (cephalothorax plus abdomen) of adult spider species reported to catch fish.

| Spider species                                                          | Spider family | Weight (g) | Body length (cm) | Location of observation | Source                                               | report #                           |
|-------------------------------------------------------------------------|---------------|------------|------------------|-------------------------|------------------------------------------------------|------------------------------------|
| <i>Agroeca lusatica</i>                                                 | Liocranidae   | N/A        | ~0.7             | Wild                    | [30,165]                                             | 86                                 |
| <i>Ancylometes bogotensis</i>                                           | Ctenidae      | 1.4–2.6    | 2                | Wild                    | [22,35]                                              | 47                                 |
| <i>Ancylometes rufus</i>                                                | Ctenidae      | ≤7         | 3–4              | Wild                    | [35,41]                                              | 58                                 |
| <i>Argyroneta aquatica</i>                                              | Cybaeidae     | ~0.1–0.3   | 1.2–1.9          | Captivity               | [23,38,88]                                           |                                    |
| <i>Desis marina</i>                                                     | Desidae       | ~0.1       | 1–1.5            | Captivity               | [19,31–32]                                           |                                    |
| <i>Dolomedes dondalei</i>                                               | Pisauridae    | N/A        | 2.5              | Captivity               | [11]                                                 |                                    |
| <i>Dolomedes facetus</i>                                                | Pisauridae    | N/A        | 2                | Wild                    | [19]                                                 | 63–64, 67, 70                      |
| <i>Dolomedes fimbriatus</i>                                             | Pisauridae    | ~0.5       | 2                | Captivity               | [13,23,89,175]                                       |                                    |
| <i>Dolomedes mizhoanus</i>                                              | Pisauridae    | N/A        | 2.4              | Wild                    | [40]                                                 | 77                                 |
| <i>Dolomedes okefinokensis</i>                                          | Pisauridae    | ~2*        | 2.5              | Wild                    | [27,29]                                              | 21–23, 28                          |
| <i>Dolomedes plantarius</i>                                             | Pisauridae    | N/A        | 2–2.5            | Wild                    | [13]                                                 | 85, 87–88                          |
| <i>Dolomedes raptor</i>                                                 | Pisauridae    | N/A        | 2.6              | Wild                    | [40]                                                 | 74                                 |
| <i>Dolomedes saganus</i>                                                | Pisauridae    | N/A        | 2.4              | Wild                    | [40]                                                 | 73, 75                             |
| <i>Dolomedes scriptus</i>                                               | Pisauridae    | N/A        | 2.4              | Wild                    | [27]                                                 | 41, 44–46                          |
| <i>Dolomedes sulfureus</i>                                              | Pisauridae    | N/A        | 2.6              | Captivity               | [23]                                                 |                                    |
| <i>Dolomedes tenebrosus</i>                                             | Pisauridae    | ~2         | 1.5–2.6          | Wild                    | [27,43]                                              | 33, 40                             |
| <i>Dolomedes triton</i>                                                 | Pisauridae    | 1–1.5      | 1.5–2.5          | Wild                    | [20,34,36]                                           | 9–12, 15, 17, 19–20, 24–27, 30, 39 |
| <i>Dolomedes vittatus</i>                                               | Pisauridae    | N/A        | 2                | Wild                    | [27]                                                 | 43                                 |
| <i>Dolomedes</i> sp. – photographed in Queensland (not <i>facetus</i> ) | Pisauridae    | N/A        | N/A              | Wild                    | Loren Jarvis, pers. comm.; Robert Raven, pers. comm. | 66                                 |
| <i>Hemirrhagus pernix</i>                                               | Theraphosidae | N/A        | 3.5              | Field experiment        | [25]                                                 |                                    |
| <i>Heteropoda natans</i>                                                | Sparassidae   | N/A        | 2.5              | Captivity               | [21,93]                                              |                                    |
| <i>Hysterochrates gigas</i>                                             | Theraphosidae | N/A        | 4–9              | Captivity               | [87]                                                 |                                    |
| <i>Nilus</i> spp.                                                       | Pisauridae    | 0.45–0.6   | 1.5–3            | Wild                    | [17,37,39]                                           | 79–84                              |
| <i>Pardosa pseudoannulata</i>                                           | Lycosidae     | 0.1        | 1                | Wild                    | [28,42,82]                                           | 78                                 |
| <i>Tinus</i> sp.                                                        | Pisauridae    | N/A        | 1.4              | Field experiment        | [25]                                                 |                                    |
| <i>Trechalea</i> spp. (e.g., <i>Trechalea tirimbina</i> )               | Trechaleidae  | ~1.5       | 2                | Wild                    | [33]; Witold Lapinski, pers. comm.                   | 48–51, 59                          |

The genus name *Thalassius* has been changed to *Nilus* [26,176].

\* Weight roughly estimated using data for similar-sized adult female *Dolomedes tenebrosus* [43].

doi:10.1371/journal.pone.0099459.t002

aquatic spider feeding on a fish while sitting on the dock wall at Shoe Lake, Ontario (report # 46).

Multiple incidences of fish predation have been reported (14 reports) from the Neotropics of large semi-aquatic spiders with a nocturnal life-style found either on the banks of rivers and streams in tropical forests in Brazil, Colombia, Costa Rica, Panama, and Peru or near shallow puddles and creeks on the lowland tropical forest floor in Ecuador (Figs. 4–5; report # 47–60). A third region where multiple fish predation events have been witnessed is Australia (twelve incidences; report # 61–71, 89), where pond fish were repeatedly caught by spiders in suburban/urban gardens of Adelaide, Brisbane, Lismore and Sydney or native freshwater fish were predated by spiders on the fringes of slow flowing streams in New South Wales and Queensland ([19]; Loren Jarvis, pers. comm.; Bradley Pusey, pers. comm.; Figs. 6A–B). Less common are reports of predation in Asia (seven reports, Figs. 6C–D; report # 72–78), which is surprising given the richness of spider taxa throughout this region [26,42]. Similarly, there is a paucity of information on fish predation by spiders in Africa, with only six documented cases from tropical secondary forests and garden

ponds (Fig. 6E–F; report # 79–84). Interestingly, only four reports originate in Europe, namely from the United Kingdom, Italy, and France (Fig. 7; Table 1; report # 85–88).

### Which Spider Species are Engaged in Fish Predation?

The superfamilies Lycosoidea and Ctenoidea are those documented as preying upon fish under open-field conditions and all can be loosely categorized as hunting spiders (i.e., spiders that forage without the use of a catching web). Approximately 80% of reports of fish predation were attributable to Pisauridae (nursery web spiders), with Ctenidae (wandering spiders; 10.3%), Trechaleidae (longlegged water spiders; 4.5%), Lycosidae (wolf spiders; 1.1%) and Liocranidae (spinylegged sac spiders; 1.1%) comprising the remainder (Fig. 8; Table 1).

The most dominant group of fish-catching spiders are in the genus *Dolomedes* (Pisauridae) (Figs. 2–3, 6A–B, D, 7–8). The spiders in this worldwide distributed genus are semi-aquatic predators with a legspan of 6–9 cm and a weight of ~0.5–2 g ([26]; Table 2). Although the various *Dolomedes* spp. appear to differ in their foraging time, some species being diurnal and others nocturnal

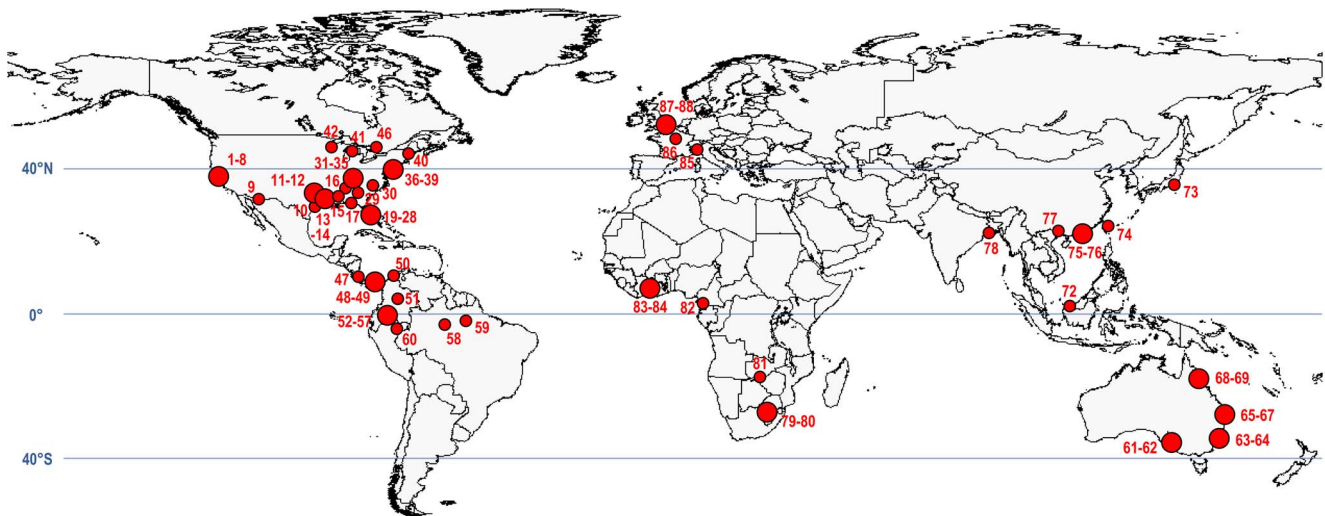

**Figure 1. Geographic distribution of fish predation by spiders worldwide.** Map depicts locations where spiders were observed preying on fish (red dots). Large red dots indicate that several reports originated from same geographic region. Numbers refer to detailed report description (see File S1). GPS coordinates were unavailable for reports #18, 43–45, and 70–71; report # 89 not included. doi:10.1371/journal.pone.0099459.g001

(File S1; [11]), these spiders share a common foraging trait in that they can swim, dive and walk on the water's surface film [69]. Indeed, the spiders in this genus are voracious predators with broad diets [69–71] and of the more than 90 species in *Dolomedes* (see Platnick [26]), eleven have been recorded catching fish in the wild (Figs. 2–3, 6A–B, D, 7; Tables 1–2). A species particularly adept at catching and eating fish in the wild is the North American *Dolomedes triton* (Figs. 2A–E, 3A; Table 1). Three more species in this genus have been observed catching fish under laboratory conditions (Table 2) suggesting that the real number of fish-catching *Dolomedes* is considerably higher than the number reported in this paper. Some species may, however, be poorly adapted to catching fish. For example, only the largest of New Zealand's three species of *Dolomedes* (*Dolomedes dondalei*) was capable of catching fish in laboratory experiments whereas the two smaller species (*Dolomedes aquaticus* and *Dolomedes minor*) were not [11].

Elsewhere in the Pisauridae, the spiders of the genus *Nilus* (Figs. 6E–F) are also semi-aquatic with similar feeding habits as *Dolomedes* [72]. They have a legspan of ~6 cm and a weight of ~0.5 g (Table 2). This genus is restricted to Africa and Asia [26] and thus far only two species – *Nilus curtus* and *Nilus massajae* – have been reported as engaging in fish predation under natural conditions (Fig. 6; Table 1). Given that other pisaurid spiders have a similar semi-aquatic lifestyle (e.g., *Megadolomedes*, *Thaumasia*, and *Tinus*), it can reasonably be deduced that such species could include fish in their diet as well ([25,73]; Kelly Swing, pers. comm.).

A number of spiders outside the Pisauridae also prey upon fish. Spiders in the genus *Ancylometes* (Ctenidae) (Fig. 4) occur mostly in South America, typically inhabiting moist Neotropical forests where they hunt at night at the edge of water bodies [26,35]. *Ancylometes rufus*, the largest species in this genus, has a leg span of 20 cm and a weight of up to 7 g [35]. *Ancylometes* can dive for up to 20 minutes [35] and at least two species – *Ancylometes bogotensis* and *Ancylometes rufus* – are known to catch fish in the wild (Tables 1–2). In addition to feeding on fish, these spiders also predate a variety of other small vertebrates such as tadpoles, frogs, toads, and lizards [41,74–77].

Members of the Neotropical genus *Trechalea* (Trechaleidae) also engage in fish predation ([17]; Fig. 5). These spiders are also large

(average adult weight of ~1.5 g and a legspan of up to 17 cm) and are typically found near shallow freshwater streams in Central and South America [33,78–79]. Adults are strictly nocturnal whereas immatures frequently hunt both day and night [33,78–79]. The trechaleids depicted in Fig. 5 could not be identified to species and might be immatures given that they were photographed during the daylight hours. Contrary to the pisaurids, the trechaleids do not chase their prey across the water surface and unlike many other fish-catching spiders are not capable of diving [79]. In similar fashion to the ctenids, *Trechalea* spp. feed on a diverse array of other food items, including insects, shrimps, and frogs [78–80].

Aside from the abovementioned spiders, with well documented though poorly understood fish-catching abilities, a number of other spiders have been reported in the literature as occasionally preying upon fish (Table 2). For example, the diurnal *Pardosa pseudoannulata* (pond wolf spider) is limited to parts of Asia and is found in stagnant pools, rice fields and swamps where it rests on aquatic plants [26,81–82]. This semi-aquatic spider, capable of swimming and diving, is one of the smallest spiders observed catching fish and there is only one report of such an event witnessed in the wild from a pond in India [82]. However, the fish-catching capability of *Pardosa pseudoannulata* has further been documented in the laboratory [82]. The capture and consumption of small vertebrates other than fish by lycosids, however, has repeatedly been reported in the literature [7,16,41,76,83–86]. This suggests that many other lycosids could include fish in their diet as well.

There is laboratory evidence that spider species of even more families (e.g., Cybaeidae, Desidae, and Sparassidae) are capable of catching and eating fish [19,21,25,85,87]. A good example is the water spider *Argyroneta aquatica* (Cybaeidae), the only truly aquatic spider (spending its entire life under water) known so far, which has been observed killing and devouring tiny fish of the families Cichlidae, Gasterosteidae, and Poeciliidae when kept in aquaria ([23,38,85,88–90]; Dolores Schütz, pers. comm.). This small spider (~0.1–0.3 g), equipped with very potent venom enabling it to kill tiny fish instantly, constructs a 'diving bell' (i.e., dome-shaped underwater web filled with air) between aquatic plants in which it digests prey, mates, etc. [23,38,90]. Two other examples of spiders reported catching fish in captivity are the semi-marine

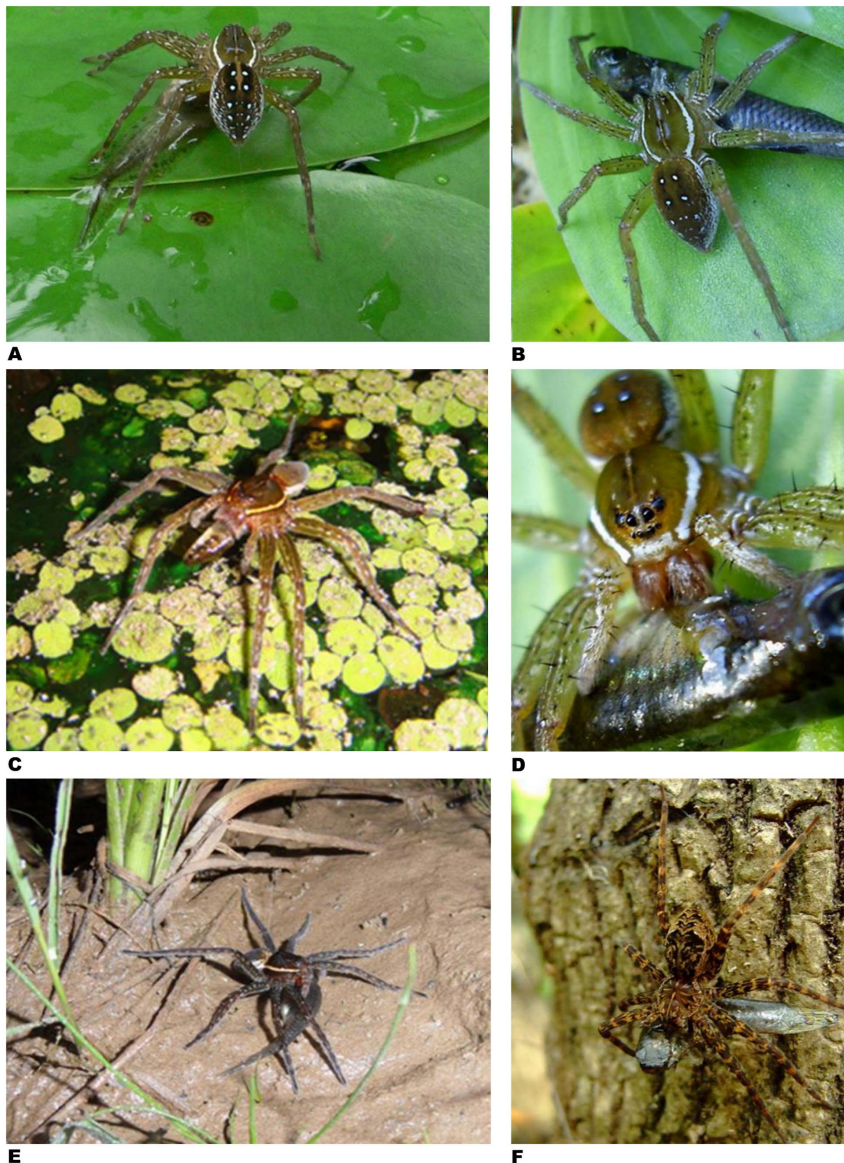

**Figure 2. Fish caught by spiders – examples from North America.** **A** – *Dolomedes triton* caught mosquitofish (*Gambusia*) in backyard pond near Tampa, Florida (photo by Stacy Cyrus, DavesGarden website; report # 24). **B** – *Dolomedes triton* feeding on fish (probably mosquitofish *Gambusia holbrooki*) in garden pond near Lady Lake, Florida (photo by Machele White, Lady Lake, Florida; report # 20). **C** – *Dolomedes triton* feeding on small fish (presumably least killifish *Heterandria formosa*) on Tsala Apopka Lake, Florida (photo by Claire Sunquist-Blunden, Ocala, Florida; report # 19). **D** – *Dolomedes triton* feeding on fish (probably mosquitofish *Gambusia holbrooki*) in garden pond near Lady Lake, Florida (same incidence as in Fig. 2B; report # 20). **E** – *Dolomedes triton* devouring fish (probably mosquitofish *Gambusia holbrooki*) on edge of small, slow-moving stream near Fayetteville, North Carolina (photo by Patrick Randall, Fort Bragg, North Carolina, USA; report # 30). **F** – *Dolomedes okefinokensis* feeding on small fish (probably mosquitofish *Gambusia holbrooki*) in swamp in Big Cypress National Preserve, Florida (photo by Misti Little, Stagecoach, Texas; report # 28).

doi:10.1371/journal.pone.0099459.g002

species *Desis marina* (Desidae) and the ‘swimming’ huntsman spider *Heteropoda natans* (Sparassidae) [21,91–93]. There are also reports of tarantulas (Theraphosidae) swimming and diving in the laboratory [87] and there are even a few reports of tarantulas seen swimming in the wild [94]. Captive theraphosids devoured dead freshwater fish which is not surprising given that these spiders are voracious, opportunistic feeders [95–96]. Some researchers assumed that certain theraphosid species in the subfamilies Eumenophorinae and Theraphosinae might be capable of predating fish [25,87]; but there are others who consider this as improbable (Robert Raven, pers. comm.).

### How Do Spiders Catch Fish?

The prey capture and feeding behavior of *Dolomedes* and *Nilus* has been well documented [11,16,20,69,72,97–98] and it was widely reported in the past that these semi-aquatic spiders depend largely on vision for prey detection [69]. However, it has since become apparent that vision plays a relatively minor role in prey detection and instead both *Dolomedes* and *Nilus* rely on stimuli perceived by mechanoreception [11,20]. Typically, semi-aquatic pisaurids anchor their hind legs to a stone or plant, with their front legs resting on the surface of the water [11,19,29,72,98], ready to ambush their prey. Carico [29] states: “....they use the surface film

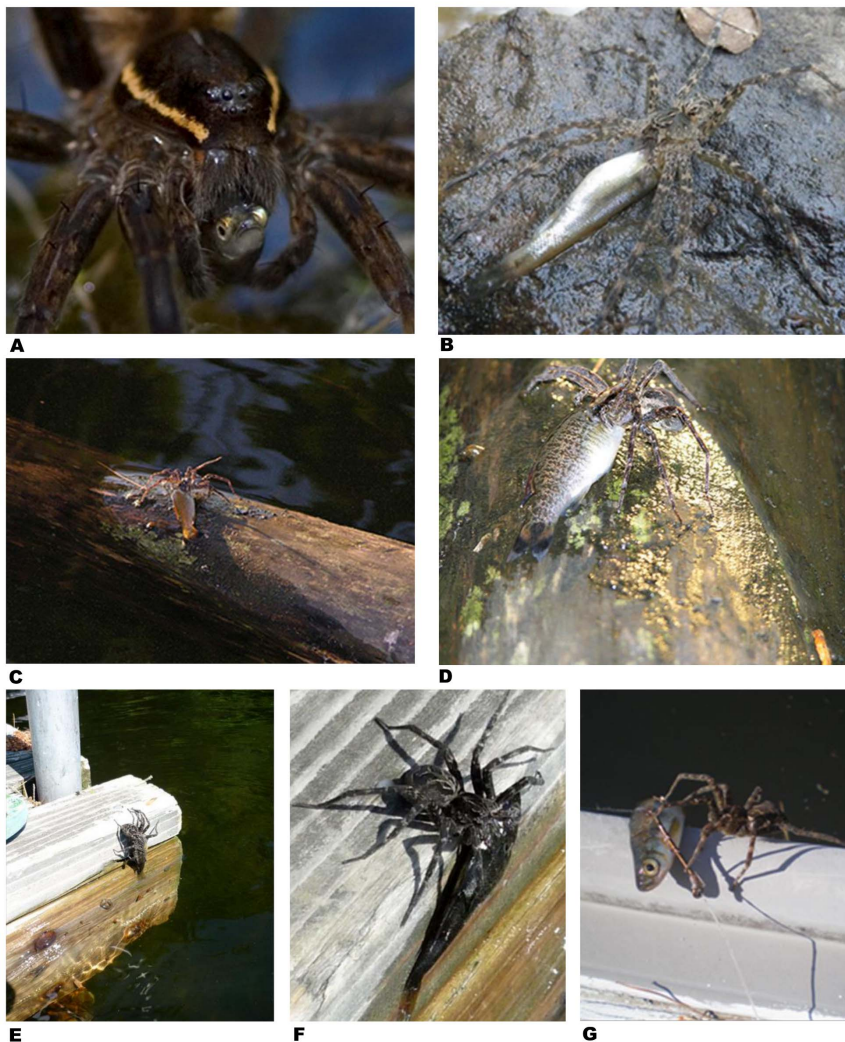

**Figure 3. Fish caught by spiders – examples from North America.** **A** – *Dolomedes triton* captured Sonora chub (*Gila ditaenia*) in small stream in Sycamore Canyon, Pajarito Mountains, Arizona (photo by Andreas Kettenburg, Thousand Oaks, California, USA; report # 9). **B** – *Dolomedes tenebrosus* devouring creek chub (*Semotilus atromaculatus*) on bank of Bulls Creek near Brutus, Kentucky (photo by Jason Butler, Lexington, USA; report # 33). **C, D** – *Dolomedes* sp. caught smallmouth bass, *Micropterus dolomieu*, on shore of Flambeau River near Ladysmith, Wisconsin, USA (photo by Tod Lewis, Austin, Texas; report # 42). **E, F** – *Dolomedes scriptus* feeding on fish (probably green sunfish *Lepomis cyanellus*) fished out of 1.8 m deep water on dock at Shoe Lake near Dorset, Ontario, Canada (photo by Lloyd Alter, Toronto, Canada; report # 46). **G** – *Dolomedes* sp. scuttled out very quickly from underneath dock attempting to attack live bait fish (probably golden shiner *Notemigonus crysoleucas*) after a mis-cast resulted in bait fish landing just off edge of dock near Sebago Lake, Maine, USA (photo by Jeffrey Hollis, East Haddam, Connecticut, USA; report # 40). doi:10.1371/journal.pone.0099459.g003

as if it were a web, because they sit at the edge of the water and pursue insects that accidentally fall upon the water and are trapped by the surface tension”. He continues “....Apparently the ripples caused by an insect provide the stimulus for the predatory response and possibly also provide information as to the location of the prey”. While this behavior may be efficient for catching insect prey, it may be less effective at catching fish due to the spiders’ rather low response to fish-generated surface waves [20] and only works under calm conditions [11]. In laboratory experiments the majority of successful fish catches occurred after the spiders’ attack behavior had been triggered through direct touch, facilitated by the dorsal fin of a fish touching one of the spider’s outstretched legs [11,20]. The fish catching behavior of ctenids and trechaleids resembles that of the pisaurids [14,22,33,78–79].

### Which Species of Fishes are Captured by Spiders?

All 89 cases of fish predation listed in Table 1 involve small freshwater fish. In 17% of the reported incidences the fish prey remained unidentified. The identifiable prey belonged primarily to the orders Cyprinodontiformes (28% of total identifiable fish prey), Cypriniformes (22%), Perciformes (20%), and Characiformes (14%) but also included the Atheriniformes, Belontiiformes, Gasterosteiformes, Osmeriformes, Salmoniformes, and Siluriformes (Table 3). The captured fish usually are among the most common fish occurring in their respective geographic area (e.g., mosquitofish [*Gambusia* spp.] in the southeastern USA, fish of the order Characiformes in the Neotropics, killifish [*Aphyosemion* spp.] in Central and West Africa, as well as Australian fishes of the genera *Galaxias*, *Melanotaenia*, and *Pseudomugil*). Spiders killed small-sized fish predominantly 2–6 cm in length (Table 1; File S1). Prey species included adults of small bodied species, usually weighing

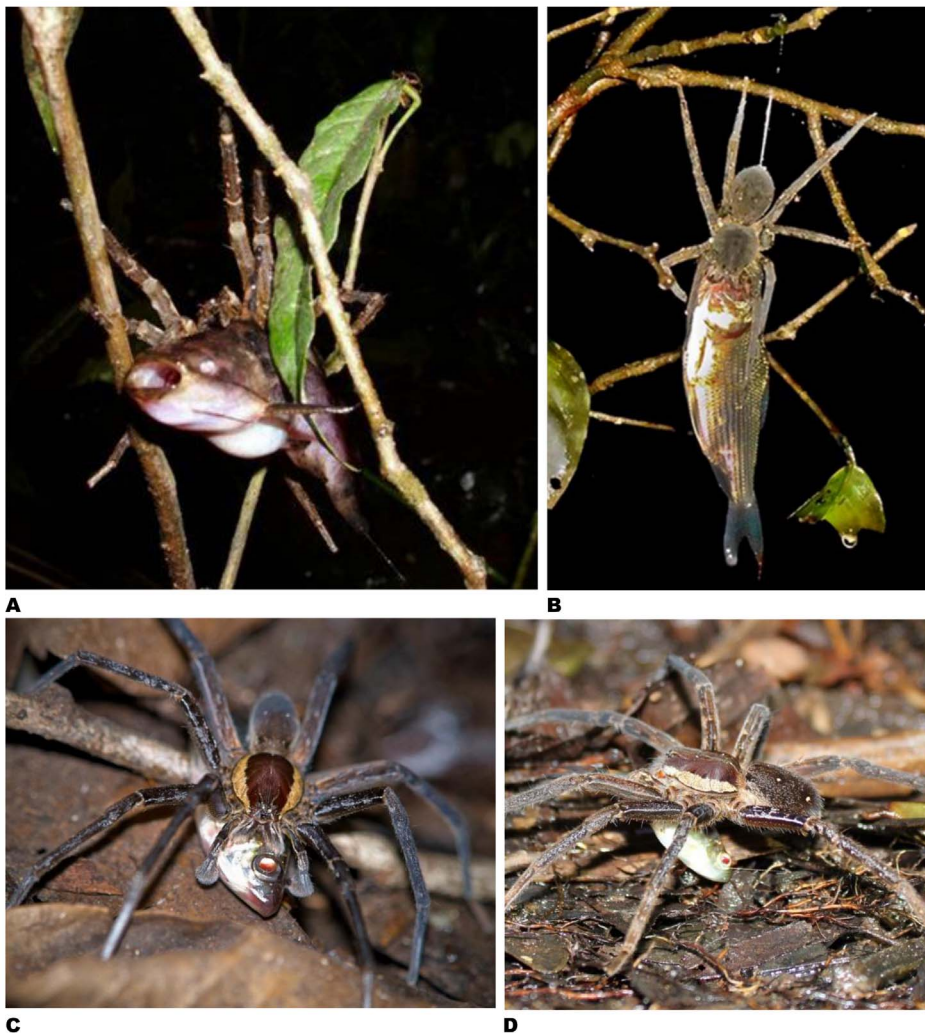

**Figure 4. Fish caught by spiders – examples from the Neotropics.** **A** – In marshy area in Cuyabeno Wildlife Reserve, Ecuador, adult *Ancylopetes* sp. (probably *Ancylopetes rufus*) lifted catfish – most likely family Pimelodidae – out of the water (photo by Craig Harrison, Hertford, UK; report # 57). **B** – Ctenid spider (*Ancylopetes* sp.) feeding on characiform in Tahuayo river area de Conservacion Regional Communal Tamshiyacu-Tahuayo Loreto, Peru (photo by Alfredo Dosantos Santillan c/o Amazonia Expeditions, Tampa, USA; report # 60). **C** – Adult male of *Ancylopetes* sp. (possibly *Ancylopetes rufus*) caught characiform (*Cyphocharax* sp.) near Samona Lodge, Cuyabeno Wildlife Reserve, Ecuador (photo by Ed Germain, Sydney, Australia; report # 52). **D** – Adult *Ancylopetes* sp. preying on characiform near Samona Lodge, Cuyabeno Wildlife Reserve, Ecuador (photo by Tim Wohlberg, Kelowna, BC Canada; report # 53). doi:10.1371/journal.pone.0099459.g004

~0.1–7 g (Table 3; e.g., *Aphyosemion* spp., *Elassoma zonatum*, *Gambusia* spp., *Heterandria formosa*, and *Pungitius laevis*) or the very small immatures of species which achieve larger body size (e.g., *Ictalurus punctatus*, *Lepomis cyanellus*, *Lepomis macrochirus*, *Micropterus dolomieu*, and *Oncorhynchus mykiss*). *Ictalurus punctatus* and *Oncorhynchus mykiss* can reach a body weight of >10 kg once fully grown.

### Predator–Prey Size Ratio

In general, spiders feed predominantly on prey items – usually insects – that are smaller than themselves [99]. This is true in spiders from many different families including semi-aquatic pisaurid spiders feeding on insect prey [100–101]. However, results herein show that semi-aquatic spiders from different families captured fish prey whose body length exceeded the spiders' body length (the captured fish being, on average, 2.2 times as long as the spiders [based on data from Table 1]).

Similar departures involve weight; spiders of the genera *Dolomedes* and *Nilus*, with a weight of ~0.5–2 g (Table 2), can catch fish prey up to 4.5 times the spider's weight [15–16,20]. In laboratory experiments, attempts by *Dolomedes triton* to catch goldfish, *Carassius auratus*, weighing 7.5–10.5 times the spiders' weight always failed (Bleckmann & Lotz [20]). Under the assumption that the largest fishing spider, the ctenid *Ancylopetes rufus* weighing up to 7 g (Table 2), is as effective in overpowering oversized prey as the smaller-sized pisaurids, fish of up to 30 g might conceivably be killed in the wild. The largest fish reported, however, to have been captured by a pisaurid spider was a *Carassius auratus* ~9 cm in length and presumably weighing >10 g (Table 3); this incidence had been witnessed in a garden pond in Sydney, Australia (report # 64).

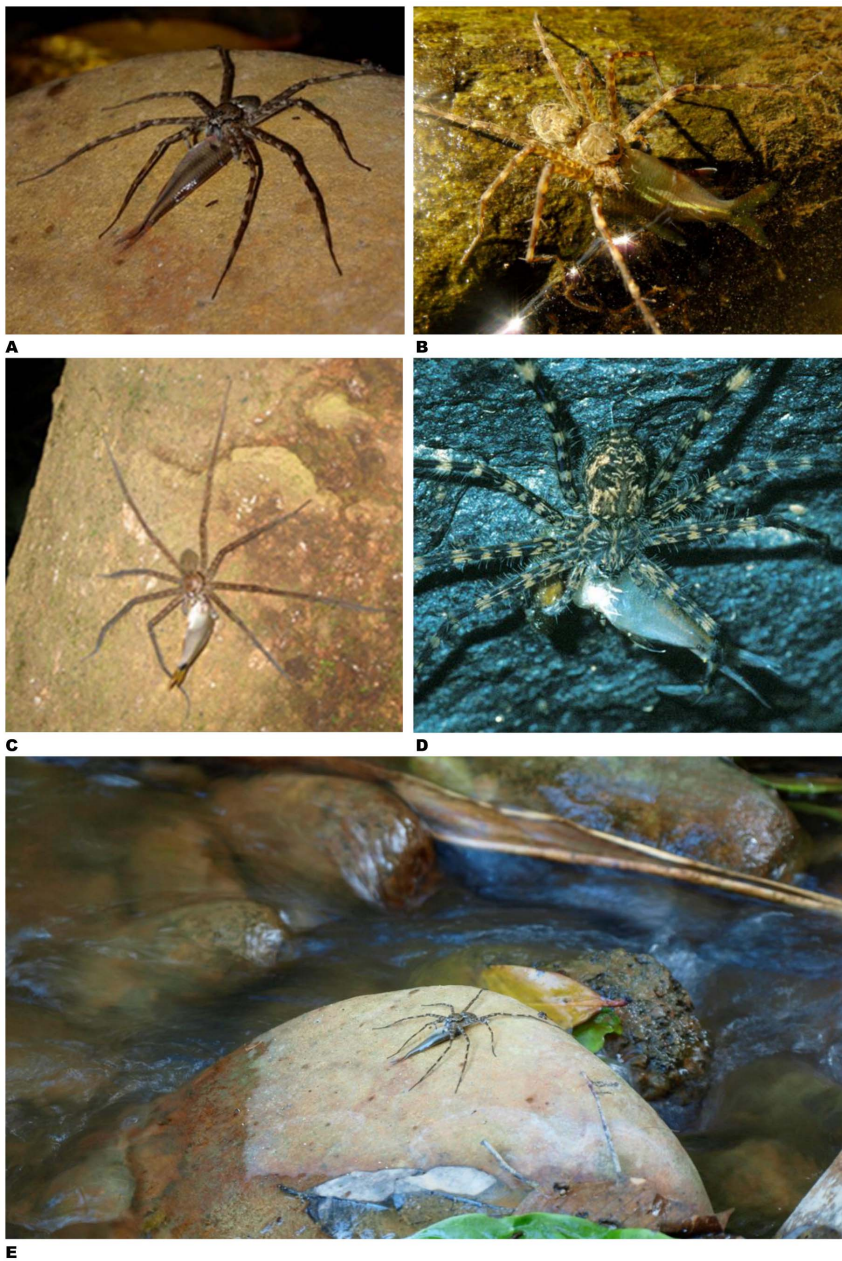

**Figure 5. Fish caught by spiders – examples from the Neotropics.** **A** – *Trechalea* sp. eating characiform while sitting on a rock in middle of small river near Paratebueno, Cundinamarca, Colombia (photo by Solimary Garcia Hernandez, Instituto de Biociências, Universidade de São Paulo, Brazil; report # 51). **B** – *Trechalea* sp. pulling characiform on stone on edge of shallow, small stream near Quebrada Valencia, Magdalena, Colombia (photo by Juan Esteban Arias A., Cali, Colombia; report # 50). **C** – *Trechalea* sp. devouring characiform while sitting on tree trunk on edge of Rio Frijoles, Central Panama (photo by Jessica Stapley, University of Sheffield, UK; report # 48). **D** – *Trechalea* sp. eating characiform on bank of Rio Maicuru, Pará State, Brazil (photo by Jacques Jangoux, Belém, Brazil; report # 59). **E** – *Trechalea* sp. eating characiform while sitting on rock in middle of small river near Paratebueno, Cundinamarca, Colombia (photo by Solimary Garcia Hernandez, Instituto de Biociências, Universidade de São Paulo, Brazil; report # 51).  
doi:10.1371/journal.pone.0099459.g005

## Discussion

### Are the Documented Incidences of Fish Consumption Real Predation Events?

It is arguable whether all incidences reported in this paper are real predation events or whether some are just cases of scavenging. Predation requires that a prey item must have been killed and eaten by the predator [102]. Both behavioral traits – killing and consumption – have been witnessed many times by a large number

of researchers in the wild and in captivity. These spiders possess large strong chelicerae capable of piercing the skin of vertebrates [23] and are equipped with powerful venoms containing hundreds of different neurotoxins, some of which are specific to vertebrate nervous systems [103–105]. The vast majority of fish (~85%) are bitten by the spiders at the base of the head (Figs. 2–7). How long it takes in a particular case to kill a fish depends on the size and species of the fish in question [23]. Small fish with a thin skin may die within a few seconds to minutes after the bite [13,19–20,23–

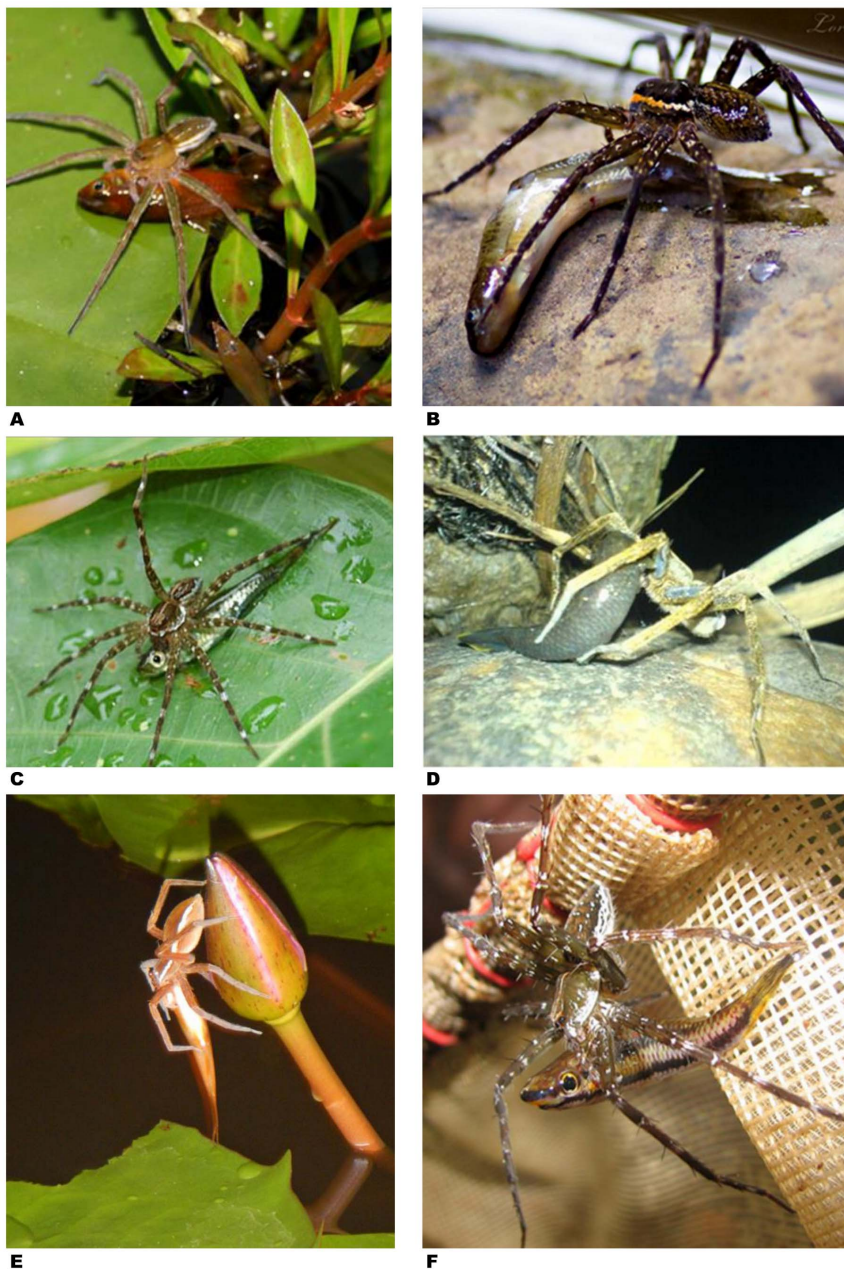

**Figure 6. Fish caught by spiders – examples from Australia, Asia, and Africa.** **A** – *Dolomedes facetus* captured pond fish (genus *Xiphophorus*) in garden pond near Brisbane, Queensland, Australia (photo by Peter Liley, Moffat Beach, Queensland; report # 67). **B** – *Dolomedes* sp. preying on mountain galaxias (*Galaxias olidus*) on bank of North Branch Creek near Goomburra, Queensland, Australia (photo by Loren Jarvis, near Brisbane, Queensland; report # 66). **C** – Semi-aquatic pisaurid devouring fish (presumably *Rasbora calliura*) at edge of shallow river flowing through forest in eastern Batang Sadong basin, Borneo (photo by Michael Lo, City of Kuching, Malaysia; report # 72). **D** – Unspecified teleost fish captured by *Dolomedes raptor* on edge of stream near Tung-Shih, Taichung county, Taiwan (photo by Tai-Shen Lin, Tunghai University, Taiwan; report # 74). **E** – Semi-aquatic pisaurid spider (*Nilus* sp.), dangling from lily flower bud, pulled unidentified fish (~4 cm in length) out of water of garden pond in Victoria Falls, Zimbabwe (photo by Marcelo de Freitas, Cresta, South Africa; report # 81). **F** – Pisaurid spider (*Nilus* sp.) in fish net attacked and captured small killifish (*Aphyosemion* sp.) in stream near city of Kribi, Cameroon (photo by Duncan Reid, Yale University, USA; report # 82). doi:10.1371/journal.pone.0099459.g006

24,69] although burbot fish (*Lota lota*) with an average fresh weight of ~0.4 g required 50 minutes before death [23]. Injection of the venom of the semi-aquatic spider *Dolomedes sulfureus* into the thorax of zebrafish (*Danio rerio*) in the laboratory caused severe neurological disturbance resulting in disorientation, uncoordinated movement (spinning), lack of buoyancy control and ultimately death within 20 min [24]. Gudger [15] reports two cases, both witnessed

in the wild, where fish bitten by *Dolomedes* spiders exhibited similar spinning behavior prior to dying.

A fish prey must always first be dragged by the spider to a dry place before the feeding process can begin [13]. Such a dry feeding site can be a rock, tree trunk, halfway immersed log, or an aquatic plant emerging from the water (Figs. 2A–B, D–F, 3B–G, 4–7). The behavior of always first moving a fish prey to a dry site prior to

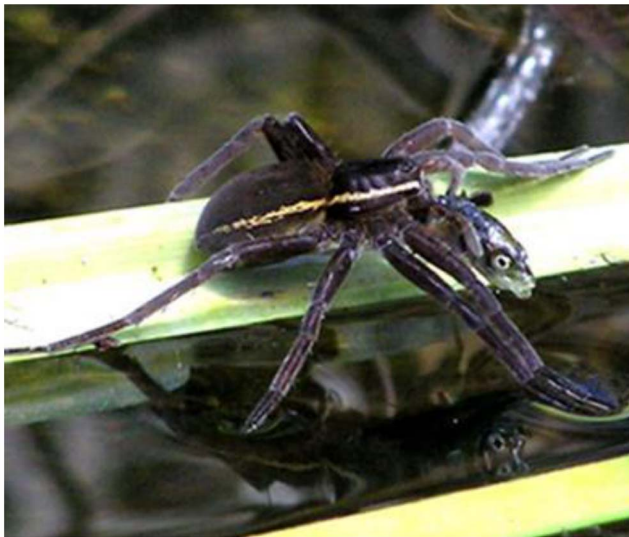

**Figure 7. Fish caught by spider – example from Europe.** Gravid adult female *Dolomedes plantarius* captured stickleback (*Pungitius laevis*) in turf pond at Redgrave and Lopham Fen National Nature Reserve in East Anglia, UK (photo by Helen Smith, South Lopham, Norfolk, UK; report # 87).  
doi:10.1371/journal.pone.0099459.g007

feeding can be explained by the spiders' extraintestinal digestion – first pumping digestive enzymes into the prey and thereafter sucking in the dissolved tissue through the mouth opening [106]; otherwise the digestive enzymes would be diluted in the water and, thus, become ineffective [8]. This type of feeding behavior has been witnessed in spiders from all families engaged in fish-catching. A second reason for this behavior may be that on land the spider has physical superiority over its aquatic prey and its potential for escape is greatly reduced.

In captivity *Dolomedes* spiders accepted dead sticklebacks as food, but this was observed only in hungry adult females during periods of increased food requirements between mating and oviposition [69]. Thus, scavenging may occasionally occur in the wild as well, if the spiders are hungry enough. On the other hand, *Trechalea* spp. did not feed on dead prey if offered in captivity [79,107]. A special case is given when spiders grab fish in fishing nets (Fig. 6F; report # 82) or – as in one case observed in Maine – attack a live bait fish landing on the dock wall after a fishing mis-cast (Fig. 3G; report # 40). We consider such incidences as predation attempts since the spider is grabbing a living fish with the intention to kill and devour it. The fact that fish are attacked even outside the water shows the high propensity for such spiders to feed on fish. A careful consideration of all the evidence available to us, where spiders had been observed/photographed feeding on fish in the wild and in captivity, led to the conclusion that the vast majority of incidences reported in this review refer to fish predation and not scavenging.

### How Frequent are Incidences of Fish Predation by Spiders?

The majority of incidences of spider predation upon fishes were reported from the Americas, especially the eastern part of USA, whereas few were reported from Africa, Asia, Australia or Europe. To a large extent, the pattern shown in Fig. 1 may simply reflect the distribution of potential observers and especially those with the capacity or propensity to report observations of spider predation. There is a high concentration of major universities and government agencies with research labs engaged in ecological

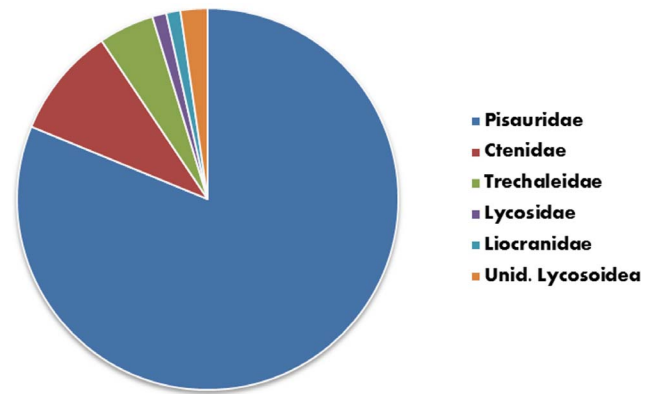

**Figure 8. Relative importance of different spider families as fish predators – based on 89 incidences reported in Table 1.**  
doi:10.1371/journal.pone.0099459.g008

projects in nearby wetland habitats in the eastern part of USA. In addition, this region contains numerous nature enthusiasts that visit the wetlands of the eastern USA for recreation and subsequently post reports and photographs of rare incidences on the world wide web. Such a concentration of researchers and enthusiasts is unlikely elsewhere, with the exception of Europe which plausibly contains as many research institutions, scientists and amateur enthusiasts, and thus may potentially bias our view of geographical patterns of the incidence of spider predation on fish. In the Neotropical region, fish predation was probably strongly underreported due to the fact that the dominant Neotropical semi-aquatic spiders (i.e., *Trechalea* spp. and *Ancylometes* spp.) occur most commonly in remote areas of the tropical rainforest and are strictly nocturnal as adults [22,35,78–79], characteristics that make their observation in the wild difficult.

Semi-aquatic spiders may be more common in some geographic regions than in others and our reported distribution of observations may reflect this difference in abundance and diversity. Semi-aquatic spiders are very common in eastern USA, particularly in the freshwater wetlands of Florida and neighboring regions (6 spp.; [29]). Nine species of *Dolomedes* occur in North America, in contrast to Europe which contains only two species [13,29]. One of the two European species (*Dolomedes plantarius*; Fig. 7), which is associated with open water and which is known to predate upon fish in the wild, has now become so rare that it is considered a threatened species – largely a consequence of the continuous loss of European freshwater wetland habitat [13,108–110]. The second European species (*Dolomedes fimbriatus*) appears to depend on open water to a lesser degree [13,108,111] and has so far never been seen predating fish in the wild (e.g., Heiko Bellmann, pers. comm.; Emanuele Biggi, pers. comm.; Franz Renner, pers. comm.; Jakob Walter, pers. comm.). It must be said that *Dolomedes fimbriatus* often occurs in wetlands such as highly acidic moorlands or seasonally intermittent marshy areas in which fish are naturally absent [101,111]. *Dolomedes fimbriatus* is perhaps less well-adapted to predating fish in the wild. An extensive observational study by Poppe & Holl [101] in moorlands of northwestern Germany revealed that *Dolomedes fimbriatus* very rarely exhibited a behavior of 'fishing' or underwater hunting while foraging for aquatic arthropod prey. Instead this species fed predominantly on terrestrial arthropods captured on plants [101]. Thus, it appears that spiders of the genus *Dolomedes* are less common (or as in the case of *Dolomedes fimbriatus* show less affinity with water inhabited by fish) in Europe than in the eastern part of USA. This may result in a lower likelihood of encountering or observing feeding on fish

**Table 3.** Fresh weight and total length of fish species reported to be captured by spiders.

| Fish species                            | Fish family         | Weight (g) | Total length (cm) | Location of observation | Source                                                                                                                                        | report #                 |
|-----------------------------------------|---------------------|------------|-------------------|-------------------------|-----------------------------------------------------------------------------------------------------------------------------------------------|--------------------------|
| <i>Aphosemion</i> spp.                  | Nothobranchiidae    | 0.2–0.7    | 3.5–4.5           | Wild                    | [54,66]                                                                                                                                       | 82–84                    |
| <i>Carassius auratus</i>                | Cyprinidae          | 0.5–7      | 2.5–7.5           | Wild                    | [49,60]                                                                                                                                       | 11, 61–62, 65            |
| <i>Carassius auratus</i>                | Cyprinidae          | ~12        | 9                 | Wild                    | [49]                                                                                                                                          | 64                       |
| <i>Cyphocharax</i> sp.                  | Curimatidae         | N/A        | 6                 | Wild                    | Ed Germain, pers. comm.                                                                                                                       | 52                       |
| <i>Cyprinus carpio</i>                  | Cyprinidae          | 0.2        | 2                 | Wild                    | Alison King, pers. comm.; Bradley Pusey, pers. comm.                                                                                          | 89                       |
| <i>Elassoma zonatum</i>                 | Elassomatidae       | 0.1–0.5    | 1.7–3.1           | Wild                    | [61]                                                                                                                                          | 1–8, 78                  |
| <i>Fundulus chrysotus</i>               | Fundulidae          | <0.1–7.8   | 2.3–4.5           | Wild                    | [61]                                                                                                                                          | 10                       |
| <i>Galaxias olidus</i>                  | Galaxiidae          | 4–5.5      | 7.7               | Wild                    | [53]                                                                                                                                          | 66                       |
| <i>Gambusia affinis</i>                 | Poeciliidae         | 0.5–2      | 3–4.5             | Wild                    | [56]                                                                                                                                          | 13, 15, 17, 21–23, 34–35 |
| <i>Gambusia holbrooki</i>               | Poeciliidae         | 0.2–1.8    | 2.5–4.5           | Wild                    | [51–52]                                                                                                                                       | 20, 28, 30, 85           |
| <i>Gasteropelecus sternicla</i>         | Gasteropelecidae    | N/A        | 4–5               | Captivity               | [20]                                                                                                                                          |                          |
| <i>Gasterosteus aculeatus</i>           | Gasterosteidae      | 1.1–2.6    | 5.1–6.6           | Captivity               | [55]                                                                                                                                          |                          |
| <i>Gila ditaenia</i>                    | Cyprinidae          | 4.5        | N/A               | Wild                    | [63]                                                                                                                                          | 9                        |
| <i>Glaniopsis hanitschi</i>             | Balitoridae         | 0.6        | ~3                | Captivity               | [21]; <a href="http://fishbase.mnhn.fr/PopDyn/">http://fishbase.mnhn.fr/PopDyn/</a>                                                           |                          |
| <i>Gobiomorphus</i> sp.                 | Eleotridae          | N/A        | 3                 | Captivity               | [11]                                                                                                                                          |                          |
| <i>Heterandria formosa</i>              | Poeciliidae         | <0.1–0.5   | 0.6–3.2           | Wild                    | [61]                                                                                                                                          | 19                       |
| <i>Ictalurus punctatus</i> (fingerling) | Ictaluridae         | 5          | 6                 | Wild                    | [68]                                                                                                                                          | 12                       |
| <i>Lamprologus pulcher</i>              | Cichlidae           | N/A        | 1.5               | Captivity               | Dolores Schütz, pers. comm.                                                                                                                   |                          |
| <i>Lebistes</i> sp.                     | Poeciliidae         | 0.1        | N/A               | Captivity               | [11,44]                                                                                                                                       |                          |
| <i>Lepomis cyanellus</i>                | Centrarchidae       | 2          | 5.3               | Wild                    | [47]                                                                                                                                          | 46                       |
| <i>Lepomis macrochirus</i>              | Centrarchidae       | 0.2–3      | 2.7–6             | Wild                    | [61,67]                                                                                                                                       | 14                       |
| <i>Limia melanogaster</i>               | Poeciliidae         | N/A        | 3                 | Captivity               | [22]                                                                                                                                          |                          |
| <i>Melanotaenia</i> spp.                | Melanotaeniidae     | 1          | 5                 | Wild                    | [58]; Bradley Pusey, pers. comm.                                                                                                              | 68                       |
| <i>Micropterus dolomieu</i>             | Centrarchidae       | ~1–2       | 4–5               | Wild                    | <a href="http://www.garden-island.com/bass-weight-formula-calculator.htm">http://www.garden-island.com/bass-weight-formula-calculator.htm</a> | 42                       |
| <i>Notemigonus crysoleucas</i>          | Cyprinidae          | 1.6–2.5    | 6.5–7.5           | Wild                    | [62]                                                                                                                                          | 40                       |
| <i>Oncorhynchus mykiss</i> (fry)        | Salmonidae          | 1          | 3                 | Wild                    | [57]                                                                                                                                          | 32                       |
| <i>Oncorhynchus mykiss</i> (fingerling) | Salmonidae          | ~3–4       | 5                 | Wild                    | [48]                                                                                                                                          | 31                       |
| <i>Oryzias curvinotus</i>               | Adrianichthyidae    | N/A        | 2–4               | Wild                    | <a href="http://www.fishbase.org/summary/Oryzias-curvinotus.html">http://www.fishbase.org/summary/Oryzias-curvinotus.html</a>                 | 75                       |
| <i>Parazacco spilurus</i>               | Cyprinidae          | N/A        | 2.5               | Wild                    | David Dudgeon, pers. comm.                                                                                                                    | 76                       |
| <i>Phoxinus phoxinus</i>                | Cyprinidae          | 0.7–2      | 4–6               | Captivity               | [1]                                                                                                                                           |                          |
| <i>Poecilia mexicana</i>                | Poeciliidae         | 0.7        | 2–3               | Field experiment        | [25,46]                                                                                                                                       |                          |
| <i>Poecilia reticulata</i>              | Poeciliidae         | 0.5–0.8    | 3.5–4             | Captivity               | [50]                                                                                                                                          |                          |
| <i>Pseudomugil</i> spp.                 | Pseudomugilidae     | ~0.5       | 3.5               | Wild                    | [58]; Bradley Pusey, pers. comm.                                                                                                              | 69                       |
| <i>Pseudorasbora parva</i>              | Cyprinidae          | 0.7        | 3.3               | Wild                    | [64]                                                                                                                                          | 73                       |
| <i>Pungitius laevis</i>                 | Gasterosteidae      | 0.3–0.7    | 3.4–4.8           | Wild                    | [55]                                                                                                                                          | 87–88                    |
| <i>Rasbora calliura</i>                 | Cyprinidae          | N/A        | 6–7               | Wild                    | Michael Lo, pers. comm.                                                                                                                       | 72                       |
| <i>Semotilus atromaculatus</i>          | Cyprinidae          | 2–3        | 6                 | Wild                    | [45]                                                                                                                                          | 33                       |
| <i>Xiphophorus helleri</i>              | Poeciliidae         | 1.3        | 4                 | Wild                    | [59]                                                                                                                                          | 67                       |
| Unknown                                 | Order Characiformes | ~1–4       | 4–6               | Wild                    | [65]                                                                                                                                          | 48–55, 59–60             |
| Unknown                                 | Percidae            | N/A        | N/A               | Wild                    | [29]                                                                                                                                          | 44                       |
| Unknown                                 | Pimelodidae         | N/A        | N/A               | Wild                    | Craig Harrison, pers. comm.                                                                                                                   | 57                       |

doi:10.1371/journal.pone.0099459.t003

**Table 4.** Estimated fresh weight (g/prey item) and caloric value (kJ/g dry weight) of different prey categories used by semi-aquatic spiders.

| Prey category                           | Fresh weight (g/prey item) | Caloric value (kJ/g dry weight) | Source            |
|-----------------------------------------|----------------------------|---------------------------------|-------------------|
| Freshwater fish (Teleostei)             | <1–7                       | 21–24                           | [177]             |
| Other vertebrates (tadpoles, frogs)     | <1–9                       | 21–25                           | [178–179]         |
| Crustaceans (crayfish, shrimps)         | 1–6                        | 12–18                           | [177,180]         |
| Water striders (Gerridae)               | ~0.03                      | N/A                             | [181–182]         |
| Backswimmers (Notonectidae)             | ~0.01–0.1                  | 24                              | [183–185]         |
| Water boatmen (Corixidae)               | ~0.02–0.05                 | 22                              | [181,186]         |
| Water beetles (Dytiscidae)              | <0.01–0.02                 | 22                              | [181–182]         |
| Water scavenger beetles (Hydrophilidae) | N/A                        | 23                              | [181]             |
| Caddisflies (Trichoptera)               | <0.01–0.04                 | 22–23                           | [181–182,184]     |
| Mayflies (Ephemeroptera)                | <0.01–0.06                 | 22–23                           | [177,181–182]     |
| Stoneflies (Plecoptera)                 | <0.01–0.2                  | 21–22                           | [177,182]         |
| Midges (Chironomidae)                   | ≤0.01                      | 21–23                           | [181–182,184]     |
| Mosquitoes (Culicidae)                  | <0.01                      | 22                              | [181,187]         |
| Dragonflies, Damselflies (Odonata)      | 0.1–1.5                    | 21–22                           | [177,181,184,188] |

doi:10.1371/journal.pone.0099459.t004

prey by such spiders in Europe. Notably however, *Dolomedes* is particularly species rich in south-east Asia [26], yet we found few verifiable records of fish predation for this region; more likely due to underreporting than the absence of fish predation per se.

Most of the reported incidences of fish predation were from a broad latitudinal band from 40° S to 40° N, with very few reported instances of fish predation by spiders occurring north of 40° N despite the fact that members of *Dolomedes*, at least, occur there [29]. This is true in both North America and Europe. The difference between the frequency of fish predation at high versus low latitude in North America is well illustrated if we compare a study from a northern location (latitude 56° N, Fairview, Canada) with one from a southern location (latitude 27° N, Tampa Bay area, Florida). Spending approximately 400 man-hours conducting some 13,000 field observations while wading slowly at the perimeter of natural ponds near Fairview, Zimmermann & Spence [100] never witnessed incidences of fish predation by *Dolomedes triton* (from a total of 625 predation events). Instead the spiders were seen feeding almost exclusively on arthropods and in one instance on a small frog [100]. The rarity of fish predation in Canada is also evidenced by the fact that according to our knowledge only one such incidence has so far been reported in this country, and this refers to a location in the most southern part of Ontario (latitude 45° N; Lloyd Alter, pers. comm.). In contrast, Brian Kenney (pers. comm.) witnessed at least half a dozen incidences of fish predation by *Dolomedes triton* while spending approximately 300 man-hours as a wildlife photographer in freshwater wetlands in the Tampa Bay area in Florida.

Fish eating spiders are constrained in the size of fish they can capture and a greater reliance on fish as prey may occur in regions inhabited by more small-bodied fish, not withstanding the fact that all large-bodied fish must also be small-bodied while juvenile. Freshwater fish assemblages of North America and Europe do indeed contain fewer small-bodied species at higher latitudes [112–114]. Further support of the hypothesis that the availability of fish of a suitable size increases reliance on this food source (assuming that reliance may be related to the frequency with which instances of fish predating upon fish are observed and reported) is provided by the relative reporting differences for eastern and

western North America shown in Fig. 1. Moyle & Herbold [115] report that the comparatively higher richness observed in eastern North American rivers compared to western North America is mainly due to the highly diversified, small-bodied taxa that occur principally in small streams in the former region.

Reduced oxygen levels lead to higher risk of predation for fish, since the fish tend to rise to the surface to exploit the oxygen-saturated surface layer [116–118]. Depletion of dissolved oxygen is particularly severe in heavily vegetated swamps and stagnant pools such as those that occur in Florida and neighboring regions [119]. Areas located at higher latitudes like Canada or much of Europe are likely characterized by lower temperatures coupled with comparatively higher dissolved oxygen levels [120], potentially resulting in lower risk of predation by *Dolomedes* spp. The same may be true for freshwater wetlands in the northern part of Asia where very few incidences of fish predation have been reported so far (Fig. 1). In Florida and neighboring regions, where fish predation has been particularly frequently witnessed, the captured fish were often mosquitofish (*Gambusia* spp.) (Figs. 2A–B, D–F). These fish, which are morphologically and behaviorally well-adapted for inhabiting oxygen deficient waters [116], are among the most abundant fish in the wetlands of this geographic region [119,121–122] and with a live weight of ~0.1–1.5 g (Table 3) they optimally fit the spiders' prey size range. As 'surface feeders', feeding on insects trapped at the water surface, and as 'surface breathers' these fish are in particular vulnerable to the attack by *Dolomedes* spp. which can walk and run on the water surface [123]. Foraging at the water's surface for terrestrial arthropod prey by both predator and prey (spider and fish, respectively) may also increase the likelihood of interaction for a range of fish species other than *Gambusia*. Australian rainbowfish (*Melanotaenia*) and blue-eyes (*Pseudomugil*) both consume terrestrial insects from the water surface [58] and both have been observed being consumed by spiders (Bradley Pusey, pers. comm.; Table 1). It is striking that the geographic distribution of fish predation by spiders in North America (Fig. 1) overlaps largely with that of mosquitofish [124]. Mosquitofish occur also in streams of southern Europe (i.e., certain regions in Portugal, Spain, southern France, Italy, and Greece; [125]) and one of the four incidences of fish predation witnessed in

Europe involved this species (report # 85). While extensive ecological field studies had been conducted in the more northern parts of Europe, the ecology of spiders in southern Europe is less well-studied and it is possible that fish predation by spiders in that region has been underreported due to the lack of studies conducted in mosquitofish habitats. In large parts of Europe and Palearctic Asia, mosquitofish are absent and *Dolomedes* spiders may have difficulty catching other types of resident small fish, all of which are less likely to venture close to the water surface (e.g., sticklebacks and minnows of the genus *Phoxinus*) (David Dudgeon, pers. comm.). This seems to be in line with the observations of filmmaker Martin Dohrn (Bristol, UK), whereupon several specimens of *Dolomedes fimbriatus* had difficulty capturing sticklebacks (*Gasterosteus aculeatus*) and minnows (*Phoxinus phoxinus*) in a pool (staged situation). In the case of the sticklebacks, their dorsal spines makes it difficult for predators to catch them [126] and for spiders to bite them at the base of their head. Nevertheless, sticklebacks have very rarely been captured by *Dolomedes plantarius* in a turf pond at Redgrave and Lopham Fen National Nature Reserve in East Anglia, UK (Fig. 7; report # 87–88). Other factors may also drive habitat selection by fish and increase their likelihood of encountering a waiting spider. For example, *Gambusia* spp. frequently occur in shallow water or densely vegetated stream margins in order to avoid predation by piscivorous fishes, a behavior common amongst small-bodied stream dwelling fishes [127].

### How Important is Fish Predation in Nutritional Ecology of Spiders?

All five spider families reported in this paper as fish predators under natural conditions (Ctenidae, Liocranidae, Lycosidae, Pisauridae, and Trechaleidae) are known from the literature to feed predominantly on arthropods [79,100–101,128–130]. The feeding biology of ctenids, liocranids, lycosids, and trechaleids in the field is still poorly understood and one cannot currently judge whether predating fish is significant from a feeding ecological point of view. However, the one incidence of a spider of the family Liocranidae feeding on a tiny fish is rather surprising. Due to its terrestrial life style and its very small size (measuring <1 cm in length) this liocranid is an unlikely fish predator and the incidence reported here (report # 86) might have been a peculiar chance event.

Fish probably constitute a minor proportion of the diet of semi-aquatic members of the family Pisauridae [8,11,100–101]. Nonetheless, in certain circumstances predation may become highly focussed upon fish. For example, fish predation by semi-aquatic pisaurids has been particularly frequently witnessed in shallow freshwater wetlands at many different locations in Florida (report # 17–28), with multiple incidences of this feeding behavior witnessed at a single location (e.g., [121]). Gudger [17] and Meehan [131] noted that large numbers of small fish were killed and devoured by semi-aquatic pisaurids in hatchery rearing ponds in Oklahoma and Tennessee, respectively (report # 12, 31–32). In one rearing pond in Oklahoma the spiders exhibited a behavior of ‘wasteful killing’ of fish (i.e., despite apparent satiation the spiders continued killing fish, thereafter consuming each fish prey item only partially; see [131–133]). Semi-aquatic pisaurids are indeed capable of killing several prey in succession [23]. Still another example of piscivorous feeding behavior is reported from the San Francisco, California, area where numerous small fish were killed and devoured within just a few days by a single spider specimen (presumably a *Dolomedes* sp.), that had become established next to an aquarium in the Steinhart Aquarium building ([18]; report # 1–8). Admittedly, these examples are not based on natural

conditions but clearly the spiders involved evidently were temporarily specializing on fish prey (i.e., complete piscivory). This suggests that although *Dolomedes* spp. are predators with broad diets composed of invertebrates and vertebrates [69–71], they are capable of temporarily narrowing their feeding niche by feeding to a large extent on small fish prey when this prey type becomes available in large numbers.

Multiple incidences of fish predation by semi-aquatic spiders have been reported from the Cuyabeno Wildlife Reserve in Ecuador (report # 52–57). In this wildlife reserve, semi-aquatic ctenid spiders (*Ancylometes* spp.) were observed to feed heavily on fish at the edge of forest puddles or creeks. There is substantial observational evidence that subadults and adults of *Ancylometes* spp. feed to a large extent on small aquatic vertebrates [35,41,74–77,134–137], whereas the immatures of these spider species are probably predominantly arthropod eaters ([129]; Thierry Gasnier, pers. comm.). In this case, the relative reward of switching to a diet comprised substantially of fish may have been improved by more efficient foraging due to the shallow nature of the aquatic habitat (i.e., puddles).

It takes semi-aquatic spiders many hours to consume a fish [11,13,69], suggesting that spiders can extract a substantial amount of energy while feeding on such large prey. Indeed, a fish prey has a ~20–200 times higher biomass than average-sized insect prey (e.g., water striders *Gerris* spp. with an average weight of ~0.03 g; Table 4). Typically predators are much larger than their prey. Brose et al. [138] estimate an average  $\log_{10}$  predator/prey ratio of  $1.62 \pm 0.03$  (i.e., 42 times larger) and in this respect, the disparity in size of fish catching spiders and their prey is especially noteworthy. It must be added that the caloric value of fish and insect tissue do not differ significantly (~20–24 kJ/g dry weight; Table 4) and that fish and insect prey are both excellent sources of protein [139]. A substantial proportion of the mass of an arthropod is comprised of exoskeleton which is of no nutritional value to a spider. In contrast, the great bulk of the mass of a fish is comprised of muscle tissue. On an individual prey basis, fish are likely a more rewarding meal than an equivalently sized invertebrate, and especially energetically and nutritionally rewarding given the size of the meal particularly where fish are easily acquired. Fish may, thus, represent a ‘big ticket item’ in the nutritional budget of semi-aquatic spiders. Feeding on fish may be particularly advantageous during the mating period when the elevated energy and protein requirements of gravid female spiders require increased food intake [13] or at times of limited availability of invertebrate prey when feeding frequency is otherwise depressed and cannibalism elevated [100–101]. Complete piscivory is probably rare and restricted to those occasions when semi-aquatic spiders gain easy access to small fish kept at high density in artificial rearing ponds or aquaria [18,131] or in small shallow waterbodies (see references above pertaining to *Ancylometes*). Additional research will be needed to reveal the extent and nutritional importance of fish in the diet of these spiders.

### How Important are Semi-Aquatic Spiders in Aquatic Food Webs?

Riparian zones are widely recognised as ecotones of high productivity, diversity and ecological importance and cross boundary transfer of material from terrestrial and aquatic environments is frequently fundamental to the nature of the food webs of both [140–143]. Spiders do occur in the diet of fish specialising in the consumption of terrestrial invertebrates that inadvertently enter and subsidise food webs of the aquatic environment [58,144–147] and semi-aquatic spiders serve as food for numerous aquatic and semi-aquatic vertebrate predators such

as juvenile crocodilians [148–152], marshsnakes [153], anurans [145], wading birds such as herons [29,154], and passerine birds [155]. Furthermore, semi-aquatic spiders may compete with aquatic predators for insect prey floating on the water surface (e.g., *Dolomedes* spp. versus sunfish *Lepomis* spp. [144,156]). Apart from fish, a variety of aquatic crustaceans (i.e., crayfish, crabs, shrimps, and amphipods) are consumed by these spiders [19,78,157–159] and furthermore the adult stage of many aquatic insects is consumed by semi-aquatic spiders. Adults of aquatic insect species greatly enhance the overall abundance of insects in riparian zones [160] and this subsidy allows spider abundance, biomass and diversity to be significantly elevated (see Sanzone et al. [161]). Semi-aquatic spiders are an important component of freshwater and terrestrial food webs with multiple linkages within and between both [39,100,162].

## Concluding Remarks

It has been long-known that semi-aquatic spiders of the family Pisauridae occasionally predate small fish; however, past studies focused on just two genera of a single family (i.e., *Dolomedes* and *Nilus* [8,163–164]). We found that the diversity of spider families engaged in fish predation is much higher than previously thought and encompasses at least eight spider families. Fish predation by spiders is geographically widespread but largely limited to the warmer areas between 40° S and 40° N. Semi-aquatic spiders capture a wide diversity of fish species but are constrained in the size of prey they can capture. The capture and consumption of fish by spiders represents a significant departure from the average dietary patterns and predator-prey size ratios reported in the literature and fish might be an occasional prey item of substantial nutritional importance. A better understanding of the nutritional ecology of the semi-aquatic spiders and their ecosystem role is needed.

## Acknowledgments

Many people have contributed to this review paper. First we wish to thank those scientists who identified fishes based on photographs - including James Albert (University of Louisiana), Jeanette Carpenter Haegele (USGS Denver Field Station), Glen Collier (University of Tulsa), Dean Hendrickson (University of Texas), Jeffrey Hill (University of Florida), Brett Johnson (Colorado State University),

Frank Jordan (Loyola University New Orleans), Mark Kennard (Griffith University), Maurice Kottelat (National University of Singapore), Edith Marsh-Matthews (University of Oklahoma), Larry Page (Florida Museum of Natural History), Lynne Parenti (National Museum of Natural History), Andrew Simons (University of Minnesota), Rainer Sonnenberg (Zoologisches Forschungsinstitut Alexander Koenig), Donald Stewart (State University of New York), Melanie Stiassny (American Museum of Natural History), and Richard Vari (National Museum of Natural History). Antonio Brescovit (Instituto Butantan), Ansie Dippenaar-Schoeman (University of Pretoria), G.B. Edwards (Florida State Collection of Arthropods), Hubert Höfer (Staatliches Museum für Naturkunde Karlsruhe), Kelly Kissane (Blinn College), Astri Leroy (The Spider Club of Southern Africa), Robert Raven (Queensland Museum), Adalberto Santos (Universidade Federal de Minas Gerais), and Estevam L. Cruz da Silva (Field Museum of Natural History) identified spider species in the photographs. Tadashi Miyashita (University of Tokyo) conducted a survey among spider researchers in Japan, using a mailing list of “kumonet”. Appreciation is also expressed to the following people who helped us in various ways: David Dudgeon (University of Hong Kong), Thierry Gasnier (Universidade Federal do Amazonas), James Harwood (University of Kentucky), Alison King (Charles Darwin University), Mirjam Knörnschild (University of Ulm), Witold Lapinski (University of Ulm), Markus Metz (University of Ulm), Dolores Schuetz (University of Bern), Helen Smith (www.dolomedes.org.uk), I-Min To (Tunghai University), and Jakob Walter (Fischzuchtanstalt Neuhausen) and of course, the many people who provided unpublished information and photographs.

## Supporting Information

**File S1 Detailed Reports Description.**  
(DOC)

**Flow Diagram S1 PRISMA 2009 Flow Diagram.**  
(DOC)

**Checklist S1 PRISMA 2009 Checklist.**  
(DOC)

## Author Contributions

Conceived and designed the experiments: MN. Performed the experiments: MN. Analyzed the data: MN BJP. Contributed reagents/materials/analysis tools: MN. Wrote the paper: MN BJP. Field work: BJP.

## References

- Raven P (1986) The size of minnow prey in the diet of young Kingfishers *Alcedo atthis*. *Bird Study* 33: 6–11.
- Aizpurua O, Garin I, Alberdi A, Salsamendi E, Baagøe H, et al. (2013) Fishing long-fingered bats (*Myotis capaccinii*) prey regularly upon exotic fish. *PLoS ONE* 8: e80163.
- Madenjian MP, Gabrey SW (1995) Waterbird predation on fish in western Lake Erie: A bioenergetics model application. *Condor* 97: 141–153.
- Pitt WC, Conover MR (1996) Predation at intermountain west fish hatcheries. *J Wildlife Manage* 60: 616–624.
- Helfman G, Collette BB, Facey DE, Bowen BW (2009) The diversity of fishes: biology, evolution, and ecology. Second edition. Oxford, UK: Wiley-Blackwell. 736 p.
- Townsend CR, Hildrew AG (1978) Predation strategy and resource utilisation by *Plectrocnemia conspersa* (Curtis) (Trichoptera: Polycentropodidae). In: Crichton ML, editor. *Proceedings of the 2nd International Symposium on Trichoptera*. The Hague: Junk. pp. 283–291.
- McCormick S, Polis GA (1982) Arthropods that prey on vertebrates. *Biol Rev* 57: 29–58.
- Gertsch WJ (1979) *American spiders*. Second edition. New York: Van Nostrand Reinhold. 196 p.
- Brooks DM (2012) Birds caught in spider webs: A synthesis of patterns. *Wilson J Ornithol* 124: 345–353.
- Nyffeler M, Knörnschild M (2013) Bat predation by spiders. *PLoS ONE* 8: e58120.
- Williams DS (1979) The feeding behaviour of New Zealand *Dolomedes* species (Araneae: Pisauridae). *New Zeal J Zool* 6: 95–105.
- Foelix RF (1992) *Biologie der Spinnen*. 2. Auflage. Stuttgart: Georg Thieme Verlag. 331 p.
- Bellmann H (1997) *Kosmos-Atlas Spinnentiere Europas*. Stuttgart: Franckh-Kosmos-Verlag. 304 p.
- Pickard-Cambridge FOP (1903) On some new species of spiders belonging to the families Pisauridae and Senoculidae; with characters of a new genus. *P Zool Soc Lond* 73: 151–168.
- Gudger WE (1922) Spiders as fishermen. *J Am Mus Nat Hist* 22: 565–568.
- Abraham N (1923) Observations on fish and frog-eating spiders of Natal. *Ann Natal Mus* 5: 89–95.
- Gudger WE (1925) Spiders as fishermen and hunters. *J Am Mus Nat Hist* 25: 261–275.
- Gudger WE (1931) Some more spider fishermen. *Nat Hist* 31: 58–61.
- McKeown KC (1943) Vertebrates captured by Australian spiders. *Proc R Zool Soc NSW* 1942/43: 17–30.
- Bleckmann H, Lotz T (1987) The vertebrate-catching behaviour of the fishing spider *Dolomedes triton* (Araneae, Pisauridae). *Anim Behav* 35: 641–651.

21. Airamé S, Sierwald P (2000) Hunting and feeding behavior of one *Heteropoda* species in lowland rainforest on Borneo (Araneae, Sparassidae). *J Arachnol* 28: 251–253.
22. Brzostowicz F, Greven H (2007) Beobachtungen an der Fischerspinne *Ancylometes bogotensis* Keyserling, 1877 (Araneae). *Acta Biol Benrodis* 14: 39–54.
23. Uzenbaev SD, Lyabzina SN (2009) An experimental study of the effects of spider venom on animals. *Entomol Rev* 89: 479–486.
24. Wang H, Zhang F, Li D, Xu S, He J, et al. (2013) The venom of the fishing spider *Dolomedes sulfureus* contains various neurotoxins acting on voltage-activated ion channels in rat dorsal root ganglion neurons. *Toxicon* 65: 68–75.
25. Horstkotte J, Riesch R, Plath M, Jäger P (2010) Predation by three species of spiders on a cave fish in a Mexican sulphur cave. *Bull Brit Arachnol Soc* 15: 55–58.
26. Platnick NI (2013) The world spider catalog, version 14.0. American Museum of Natural History. Available: <http://research.amnh.org/iz/spiders/catalog/>. Accessed 2013 October 18.
27. Bishop SC (1924) A revision of the Pisauridae of the United States. *B NY St Mus* 252: 1–140.
28. Ito Y (1964) Preliminary studies on the respiratory energy loss of a spider *Lycosa pseudomulata*. *Res Popul Ecol* 6: 13–21.
29. Carico JE (1973) The Nearctic species of the genus *Dolomedes* (Araneae: Pisauridae). *Bull Mus Comp Zool* 144: 435–488.
30. Jones D (1983) The country life guide to spiders of Britain and Europe. Feltham, UK: The Hamlyn Publishing Group. 320 p.
31. McQueen DJ, Pannell LK, McLay CL (1983) Respiration rates for the intertidal spider *Desis marina* (Hector). *New Zeal J Zool* 10: 393–399.
32. McLay CL, Hayward TL (1987) Population structure and use of *Durivillaea antarctica* holdfasts by the intertidal spider *Desis marina* (Araneae: Desidae). *New Zeal J Zool* 14: 29–42.
33. Carico JE (1993) Revision of the genus *Trechalea* Thorell (Araneae, Trechaleidae) with a review of the taxonomy of the Trechaleidae and Pisauridae of the Western Hemisphere. *J Arachnol* 3: 226–257.
34. Suter RB, Rosenberg O, Loeb S, Wildman H, Long JH (1997) Locomotion on the water surface: propulsive mechanisms of the fisher spider *Dolomedes triton*. *J Exp Biol* 200: 2523–2538.
35. Höfer H, Brescovit AD (2000) A revision of the neotropical spider genus *Ancylometes* Bertkau (Araneae: Pisauridae). *Insect Syst Evol* 31: 323–360.
36. Suter RB, Gruenwald J (2000) Spider size and locomotion on the water surface (Araneae, Pisauridae). *J Arachnol* 28: 300–308.
37. Leroy J, Leroy A (2003) Spiders of Southern Africa. Cape Town: Struik Publishers. 96 p.
38. Schütz D, Taborsky M (2003) Adaptations to an aquatic life may be responsible for the reversed sexual size dimorphism in the water spider, *Argoneta aquatica*. *Evol Ecol Res* 5: 105–117.
39. Vonesh JR (2003) Sequential predation in a complex life history: interactions among egg, larval, and post-metamorphic predators of the East African tree frog, *Hyperolius spinularis*. Ph.D. thesis, University of Florida, Gainesville, Florida, USA.
40. Zhang JX, Zhu MS, Song DX (2004) A review of the Chinese nursery-web spiders (Araneae, Pisauridae). *J Arachnol* 32: 353–417.
41. Menin M, Rodrigues DJ, Azevedo CS (2005) Predation on amphibians by spiders (Arachnida, Araneae) in the Neotropical region. *Phyllomedusa* 4: 39–47.
42. Sebastian PA, Peter KV (2009) Spiders of India. First edition. Hyderabad: Universities Press. 734 p.
43. Nicholas AC, Stratton TA, Reed D (2011) Reproductive allocation in female wolf and nursery-web spiders. *J Arachnol* 39: 22–29.
44. Schuster-Woldan E (1939) Über die individuelle Empfindlichkeit von *Lebistes reticulatus* gegenüber Nikotinlösungen verschiedener Konzentrationen. *Naunyn Schmiedeberg Arch Pharmacol* 194: 156–164.
45. Moshenko RW (1972) Ecology of the northern creek chub, *Semotilus atromaculatus atromaculatus* (Mitchill), in the Mink River, Manitoba. M.Sc. thesis, University of Manitoba, Winnipeg, Manitoba, Canada.
46. Bryan PG (1980) The efficiency of mollies, *Poecilia mexicana*, as a live bait for pole-and-line skipjack fishing: fishing trials in the tropical Pacific. *Mar Fish Rev* 42: 15–24.
47. Mannes JC, Jester DB (1980) Age and growth abundance and biomass production of green sunfish, *Lepomis cyanellus* (Centrarchidae), in a eutrophic desert pond. *Southwest Nat* 25: 297–311.
48. Hughes SG (1984) Effect of excess dietary riboflavin on growth of rainbow trout. *J Nutr* 114: 1660–1663.
49. Holopainen IJ, Pitkanen AK (1985) Population size and structure of crucian carp (*Carassius carassius* (L.)) in two small, natural ponds in Eastern Finland. *Ann Zool Fenn* 22: 397–406.
50. Loonen H, Parsons JR, Govers HAJ (1994) Effect of sediment on the bioaccumulation of a complex mixture of polychlorinated dibenzo-p-dioxins (PCDDs) and polychlorinated dibenzofurans (PCDFs) by fish. *Chemosphere* 28: 1433–1446.
51. Schaefer JF, Heulett ST, Farrell TM (1994) Interactions between two poeciliid fishes (*Gambusia holbrooki* and *Heterandria formosa*) and their prey in a Florida marsh. *Copeia* 1994: 516–520.
52. Mulvey M, Newman MC, Chazal A, Keklak MM, Heagler MG, et al. (1995) Genetic and demographic responses of mosquitofish (*Gambusia holbrooki* Girard 1859) populations stressed by mercury. *Environ Toxicol Chem* 14: 1411–1418.
53. Zampatti B, Raadik TA (1997) An assessment of environmental flow requirements for Hoddles Creek, Marine and Freshwater Resources Institute Freshwater Ecology Division, prepared for Melbourne Water Corporation. Available: [http://melbournewater.com.au/waterdata/waterwaydiversionstatus/Documents/Hoddles-Creek-stream-flow\\_management-plan.pdf](http://melbournewater.com.au/waterdata/waterwaydiversionstatus/Documents/Hoddles-Creek-stream-flow_management-plan.pdf). Accessed 2013 October 18.
54. King RP (1998) Weight-fecundity relationships of Nigerian fish populations. *Naga, The ICLARM Quarterly* 21: 33–36.
55. Soleng A, Bakke TA (1998) The susceptibility of three-spined stickleback (*Gasterosteus aculeatus*), nine-spined stickleback (*Pungitius pungitius*) and flounder (*Platichthys flesus*) to experimental infections with the monogenean *Gyrodactylus salaris*. *Folia Parasit* 45: 270–274.
56. Offill YA, Walton WE (1999) Comparative efficacy of the threespine stickleback (*Gasterosteus aculeatus*) and the mosquitofish (*Gambusia affinis*) for mosquito control. *J Am Mosquito Contr* 15: 380–390.
57. LaFrentz BR, LaPatra SE, Jones GR, Cain KD (2003) Passive immunization of rainbow trout, *Oncorhynchus mykiss* (Walbaum), against *Flavobacterium psychrophilum*, the causative agent of bacterial coldwater disease and rainbow trout fry syndrome. *J Fish Dis* 26: 371–84.
58. Pusey BJ, Kennard MJ, Arthington AH (2004). Freshwater fishes of north-eastern Australia. Melbourne: CSIRO Publishing. 645 p.
59. James R, Sampath K (2004) Effect of animal and plant protein diets on growth and reproductive performance in an ornamental fish, *Xiphophorus helleri*. *Indian J Fish* 51: 75–86.
60. Rybczyk A, Szygula J (2005) Age as well as length and weight growth of crucian carp from the Szczecin lagoon and the Leszczynskie lakeland, *EJPAU* 8(3):06. Available: <http://www.ejpau.media.pl/volume8/issue3/art-06.html>. Accessed: 2013 October 18.
61. Tate WB, Walsh SJ (2005) Distribution and ecological requirements of the Okefenokee pygmy sunfish and the blackbanded sunfish in Florida. Final report. Florida Fish and Wildlife Conservation Commission, Tallahassee, Florida, USA. 29 p. Available: [http://research.myfwc.com/engine/download\\_redirection\\_process.asp?file=05tate\\_3836.pdf&objid=49824&dlttype=publication](http://research.myfwc.com/engine/download_redirection_process.asp?file=05tate_3836.pdf&objid=49824&dlttype=publication). Accessed 2013 October 18.
62. Leblond C, Reebs SG (2006) Individual leadership and boldness in shoals of golden shiners (*Notemigonus crysoleucas*). *Behaviour* 143: 1263–1280.
63. Estabrook GF, Smith GR, Dowling TE (2007) Body mass and temperature influence rates of mitochondrial DNA evolution in North American cyprinid fish. *Evolution* 61: 1176–1187.
64. Kapusta A, Bogacka-Kapusta E, Czarnecki B (2008) The significance of stone moroko, *Pseudorasbora parva* (Temminck and Schlegel), in the small-sized fish assemblages in the littoral zone of the heated Lake Licheńskie. *Arch Pol Fish* 16: 49–62.
65. Fontoura NF, Jesus AS, Larre GG, Porto JR (2010) Can weight/length relationship predict size at first maturity? A case study with two species of Characidae. *Neotrop Ichthyol* 8: 835–840.
66. Okorie A, Abiodun O (2010) Laboratory evaluation of the biocontrol potential of *Aphyosemion gularis* against *Anopheles* larvae. *J Vector Dis* 47: 181–184.
67. Yamamoto Y, Tsukada H, Nakai D (2010) Latitudinal gradient in the body weight of bluegill *Lepomis macrochirus* in Lake Biwa, Japan. *Zool Stud* 49: 625–631.
68. Arias CR, Cai W, Peatman E, Bullard SA (2012) Catfish hybrid *Ictalurus punctatus* × *I. furcatus* exhibits higher resistance to columnaris disease than the parental species. *Dis Aquat Organ* 100: 77–81.
69. Schmidt G (1957) Einige Notizen über *Dolomedes fimbriatus* (CL). *Zool Anz* 158: 83–97.
70. Nyffeler M, Symondson WOC (2001) Spiders and harvestmen as gastropod predators. *Ecol Entomol* 26: 617–628.
71. Nyffeler M, Moor H, Foelix RF (2001) Spiders feeding on earthworms. *J Arachnol* 29: 119–124.
72. Sierwald P (1988) Notes on the behavior of *Thalassius spinosissimus* (Arachnida: Araneae: Pisauridae). *Psyche* 95: 243–252.
73. Queensland Museum (2013) Spiders. Available: <http://www.qm.qld.gov.au/Find+out+about/Animals+of+Queensland/Spiders/Modern+Spiders+Infraorder+Araneomorphae/Water+Fishing+or+Nursery+Spiders/Giant+Water+Spider>. Accessed 2013 October 18.
74. Caldwell JP, de Araujo MC (1998) Cannibalistic interactions resulting from indiscriminate predatory behavior in tadpoles of poison frogs (Anura: Dendrobatidae). *Biotropica* 30: 92–103.
75. Eterovick PC, Brandao RA (2001) A description of the tadpoles and advertisement calls of members of the *Hyla pseudopseudis* group. *J Herpetol* 35: 442–450.
76. Maffei F, Ubaid FK, Jim J (2010) Predation of herps by spiders (Araneae) in the Brazilian Cerrado. *Herpetol Notes* 3: 167–170.
77. Moura MR, Azevedo LP (2011) Observation of predation of the giant fishing spider *Ancylometes rufus* (Walckenaer, 1837) (Araneae, Ctenidae) on *Dendropsophus melanargyreus* Cope, 1877 (Anura, Hylidae). *Biota Neotropica* 11: 349–351.
78. Berkum FH van (1982) Natural history of a tropical, shrimp-eating spider (Pisauridae). *J Arachnol* 10: 117–121.
79. Silva ELC, Picanço JB, Lise AA (2005) Notes on the predatory behavior and habitat of *Trechalea biocellata* (Araneae, Lycosoidea, Trechaleidae). *Biociências* 13: 85–88.

80. Hernández-Cuadrado EE, Bernal MH (2009) *Engystomops pustulosus* (Tungara Frog) and *Hypsiboas crepitans* (Colombian Tree Frog). Predation on anuran embryos. *Herpetol Rev* 40: 431–432.
81. Koh JKH (1989) A guide to common Singapore spiders. Singapore: Singapore Science Centre. 160 p.
82. Bhattacharjee GC (1931–32) The fish-eating spiders in Bengal and their habits. *Transact Bose Res Inst Calcutta* 7: 238–249.
83. Corey DT (1988) Comments on a wolf spider feeding on a green anole lizard. *J Arachnol* 16: 391–392.
84. Rubbo MJ, Townsend VR, Smyers SD, Jaeger RG (2003) An experimental assessment of invertebrate/vertebrate predation: the interaction between wolf spiders (*Gladicosa pulchra*) and terrestrial salamanders (*Ambystoma maculatum*). *J Zool* 261: 1–5.
85. Hillyard P (2007) The private life of spiders. London: New Holland Publishers. 160 p.
86. Gettmann W (1978) Untersuchungen zum Nahrungsspektrum von Wolfsspinnen (Lycosidae) der Gattung *Pirata*. *M Dtsch Gesell Allg Ange Ent* 1: 63–66.
87. Marshall SD (2001) Tarantulas and other arachnids. Hauppauge, NY: Barron's Educational Series. 112 p.
88. Sisson RF (1972) The spider that lives under water. *Natl Geogr* 1972: 694–701.
89. Schmidt G (1980) Spinnen – Alles Wissenswertes über Lebensweise, Sammeln, Haltung und Zucht. Minden, Germany: Albrecht Philler Verlag. 176 p.
90. Seymour RS, Hetz SK (2011) The diving bell and the spider: the physical gill of *Argyroneta aquatica*. *J Exp Biol* 214: 2175–2181.
91. Robson CH (1877) Notes on a marine spider found at Cape Campbell. *Transact Proc New Zealand Inst* 10: 299–300.
92. Pocock RI (1902) On the marine spiders of the genus *Desis*, with description of a new species. *P Zool Soc Lond* 72: 98–106.
93. Jäger P (2005) A 'swimming' *Heteropoda* species from Borneo (Araneae, Sparassidae, Heteropodinae). *J Arachnol* 33: 715–718.
94. Dunlop J (1996) Swimming in tarantulas. *Forum Am Tarantula Soc* 5: 79–81.
95. Baerg WJ (1938) Tarantula studies. *J New York Entomol Soc* 46: 31–43.
96. Breene RG Jr. (2006) Quick and Easy Tarantula Care. Neptune City, NJ: TFH Publications. 64 p.
97. Chubb EC (1913) Fish-eating habits of a spider. *Nature* 91: 136.
98. Bristowe WS (1958) The world of spiders. London: Collins. 304 p.
99. Wise DH (1993) Spiders in ecological webs. Cambridge, UK: Cambridge University Press. 328 p.
100. Zimmermann M, Spence JR (1989) Prey use of the fishing spider *Dolomedes triton* (Pisauridae, Araneae): An important predator of the neuston community. *Oecologia* 80: 187–194.
101. Poppe S, Holl A (1995) Ernährungsbiologie und Nahrungsspektrum der Gerandeten Jagdspinne *Dolomedes fimbriatus* (Araneae: Pisauridae). *Arachnol Mitt* 9: 1–11.
102. Begon M, Townsend CR, Harper JL (2005) Ecology: From individuals to ecosystems. Fourth edition. Oxford, UK: Blackwell Publishing. 752 p.
103. McCormick KD, Kobayashi K, Goldin SM, Reddy NL, Meinwald J (1993) Characterization and synthesis of a new calcium-antagonist from the venom of a fishing spider. *Tetrahedron* 49: 11155–11168.
104. Gregio AMT, Heleno MG, Von Eickstedt VR, Fontana MD (1998) The neuromuscular action of *Ancylometes* sp. spider venom in the rat phrenic nerve-diaphragm preparation. *Toxicon* 37: 545–550.
105. Jiang L, Liu C, Duan Z, Deng M, Tang X, et al. (2013) Transcriptome analysis of venom glands from a single fishing spider *Dolomedes mizhuanus*. *Toxicon* 73: 23–32.
106. Foelix RF (2011) Biology of spiders. Third edition. New York: Oxford University Press. 432 p.
107. Carico JE, Adis J, Penny ND (1985) A new species of *Trechalea* (Pisauridae: Araneae) from Central Amazonian inundation forests and notes on its natural history and ecology. *Bull Brit Arachnol Soc* 6: 289–294.
108. Duffey E (1995) The distribution, status and habitats of *Dolomedes fimbriatus* (Clerck) and *D. plantarius* (Clerck) in Europe. In: Ružicka V, editor. Proceedings of the 15th European Colloquium of Arachnology, České Budejovice, pp. 54–65.
109. Smith H (2000) The status and conservation of the fen raft spider (*Dolomedes plantarius*) at Redgrave and Lopham Fen National Nature Reserve, England. *Biol Conserv* 95: 153–164.
110. Leroy B, Paschetta M, Canard A, Bakkenes M, Isaia M, et al. (2013) First assessment of effects of global change on threatened spiders: Potential impacts on *Dolomedes plantarius* (Clerck) and its conservation plans. *Biol Conserv* 162: 155–163.
111. Helsdingen PJ van (1993) Ecology and distribution of *Dolomedes* in Europe (Araneida: Dolomedidae). *Boll Acc Gioenia Sci Nat* 26: 181–187.
112. McDowall RM (1994) On size and growth in freshwater fish. *Ecol Freshw Fish* 3: 67–79.
113. Knouft JH (2004) Latitudinal variation in the shape of the species body size distribution: an analysis using freshwater fishes. *Oecologia* 139: 408–417.
114. Griffiths D (2006) Patterns and process in the ecological biogeography of European freshwater fish. *J Anim Ecol* 75: 734–751.
115. Moyle PB, Herbold B (1987) Life-history patterns and community structure in stream fishes of western North America: comparisons with eastern North America and Europe. In: Matthews WJ, Heins DC, editors. Community and evolutionary ecology of North American stream fishes. Norman: University of Oklahoma Press. pp 25–32.
116. Lewis WH (1970) Morphological adaptations of cyprinodontoids for inhabiting oxygen deficient waters. *Copeia* 2: 319–326.
117. Kramer DL (1987) Dissolved oxygen and fish behavior. *Environ Biol Fish* 18: 81–92.
118. Moore MK, Townsend VR (1998) The interaction of temperature, dissolved oxygen and predation pressure in an aquatic predator-prey system. *Oikos* 81: 329–336.
119. McKinsey DM, Chapman LJ (1998) Dissolved oxygen and fish distribution in a Florida spring. *Environ Biol Fish* 53: 211–223.
120. Lewis WM Jr (1996) Tropical lakes: how latitude makes a difference. In: Schiemer F, Boland KT, editors. Perspectives in tropical limnology. Amsterdam: SPB Academic Publishers. pp. 43–64.
121. Barbour T (1921) Spiders feeding on small cyprinodonts. *Psyche* 28: 131–132.
122. Jordan F, Jels HL, Kitchens WM (1994) Habitat use by the fishing spider *Dolomedes triton* in a northern everglades wetland. *Wetlands* 14: 239–242.
123. Bleckmann H (1988) Prey identification and prey localization in surface-feeding fish and fishing spiders. In: Atema J, Fay RR, Popper AN, Tavolga WN, editors. In sensory biology of aquatic animals. New York: Springer-Verlag. pp. 619–641.
124. U.S. Geological Survey (2013) Nonindigenous aquatic species database. Gainesville, Florida. Available: <http://nas.er.usgs.gov/queries/FactSheet.aspx?SpeciesID=849>. Accessed 2013 October 18.
125. Vidal O, Garcia-Berthou E, Tedesco PA, Garcia-Marin J (2010) Origin and genetic diversity of mosquitofish (*Gambusia holbrooki*) introduced to Europe. *Biol Invasions* 12: 841–851.
126. Hoogland R, Morris D, Tinbergen N, (1956–57) The spines of sticklebacks (*Gasterosteus* and *Pygosteus*) as means of defence against predators (*Perca* and *Esox*). *Behaviour* 10: 205–236.
127. Perna CN, Cappel M, Burrows DW, Pusey BJ (2009) Floodplain degradation and restoration in northern Queensland: the response of the alien fish pest *Gambusia holbrooki*. *Ecol Manage Restor* 10: 241–243.
128. Kiritani K, Kawahara S, Sasaba T, Nakasuiji F (1972) Quantitative evaluation of predation by spiders on the green leafhopper *Nephotettix cincticeps* Uhler, by sight count method. *Res Popul Ecol* 13: 187–200.
129. Gasnier TR, Azevedo CS, Torres-Sanchez MP, Höfer H (2002) Adult size of eight hunting spider species in central Amazonia: temporal variations and sexual dimorphisms. *J Arachnol* 30: 146–154.
130. Ishijima C, Taguchi A, Takagi M, Motobayashi T, Nakai M, et al. (2006) Observational evidence that the diet of wolf spiders (Araneae: Lycosidae) in paddies temporarily depends on dipterous insects. *Appl Entomol Zool* 41: 195–200.
131. Meehan OL (1934) Spiders that fish. *Nat Hist* 34: 538–540.
132. Johnson DM, Akre BG, Crowley PH (1975) Modeling arthropod predation: wasteful killing by damselfly naiads. *Ecology* 56: 1081–1093.
133. Samu F, Biro Z (1993) Functional response, multiple feeding and wasteful killing in a wolf spider (Araneae: Lycosidae). *Eur J Entomol* 90: 471–476.
134. Bernarde PS, Souza MB, Kokubum MCN (1999) Predation *Hyla minuta* Peters, 1872 (Anura, Hylidae) by *Ancylometes* spp. (Araneae, Pisauridae). *Biociências* 7: 199–203.
135. Prado GM, Borgo JH (2003) *Scinax alter* (NCN). Predation. *Herpetol Rev* 34: 238–39.
136. Pazin VFV (2006) *Dendrophryniscus minutus* (Amazonian tiny tree toad). Predation. *Herpetol Rev* 37: 336.
137. Rodrigues DJ, Arruda R (2007) *Dendropsophus sarayacuensis* (Shreve's Sarayacu Treefrog). Predation. *Herpetol Rev* 38: 437.
138. Brose U, Jonsson T, Berlow EL, Warren P, Banasek-Richter C, et al. (2006) Consumer-resource body-size relationships in natural food webs. *Ecology* 87: 2411–2417.
139. van Huis A, Van Itterbeeck J, Klunder H, Mertens E, Halloran A, et al. (2013) Edible insects – Future prospects for food and feed security. *FAO Forestry Paper* 171: 1–201.
140. Nakano S, Miyasaka H, Kuhara N (1999) Terrestrial-aquatic linkages: riparian arthropods alter trophic cascades in a stream food web. *Ecology* 80: 2435–2441.
141. Naiman RJ, Bilby RE, Schindler DE, Heyfield JM (2002) Pacific salmon, nutrients, and the dynamics of freshwater and riparian ecosystems. *Ecosystems* 5: 399–417.
142. Ballinger A, Lake PS (2006) Energy and nutrient fluxes from rivers and streams to terrestrial food webs. *Mar Freshwater Res* 57: 15–28.
143. Zeug SC, Winemiller KO (2008) Evidence supporting the importance of terrestrial carbon in a large river food web. *Ecology* 89: 1733–1743.
144. Figiel CR, Miller GL (1994) Effects of fish on the growth and survival of two fishing spider populations (*Dolomedes triton*; Araneae, Pisauridae). *J Arachnol* 22: 185–189.
145. Suter RB (2003) Trichobothrial mediation of an aquatic escape response: directional jumps by the fishing spider, *Dolomedes triton*, foil frog attacks. *J Insect Sci* 3: 1–7.
146. Pusey BJ, Arthington AH (2003) Importance of the riparian zone to the conservation and management of freshwater fishes: a review with special emphasis on tropical Australia. *Mar Freshwater Res* 54: 1–16.
147. Chan EKW, Zhang Y, Dudgeon D (2008) Arthropod 'rain' into tropical streams: the importance of riparian forest and influence on fish diets. *Mar Freshwater Res* 59: 653–660.

148. Delany MF, Abercrombie CL (1986) American alligator food habits in northcentral Florida. *J Wildlife Manage* 50: 348–353.
149. Da Silveira R, Magnusson WE (1999) Diets of spectacled and black caiman in the Anavilhanas Archipelago, Central Amazonia, Brazil. *J Herpetol* 33: 181–192.
150. Riley J, Huchzermeyer FW (2000) Diet and lung parasites of swamp forest Dwarf Crocodiles (*Osteolaemus tetraspis osborni*) in the Northern Congo Republic. *Copeia* 2000: 582–586.
151. Wallace KM (2006) The feeding ecology of yearling, juvenile and sub-adult Nile crocodiles, *Crocodylus niloticus*, in the Okavango Delta, Botswana. M.Sc. thesis, University of Stellenbosch, Matieland, South Africa.
152. Cupul-Magaña FG, Rubio-Delgado A, Molano-Rendón F, Reyes-Juárez A (2008) Contenido estomacal de neonatos de *Crocodylus acutus* (Cuvier, 1807) en Boca Negra, Jalisco. *Bol Soc Herpetol Mex* 16: 41–45.
153. Greene HW (1997) Snakes: The evolution of mystery in nature. Berkeley: University of California Press. 351 p.
154. Niethammer KR, Kaiser MS (1983) Late summer food habits of three heron species in northeastern Louisiana. *Colon Waterbird* 6: 148–153.
155. Eguchi K (1980) The feeding ecology of the nestling great tit, *Parus major minor*, in the temperate ever-green broadleaved forest II. With reference to breeding ecology. *Res Popul Ecol* 22: 284–300.
156. Krupa JJ, Sih A (1998) Fishing spiders, green sunfish, and a stream-dwelling water strider: male-female conflict and prey responses to single versus multiple predator environments. *Oecologia* 117: 258–265.
157. Bristowe WS (1941) The comity of spiders II. London: Ray Society. 560 p.
158. Whitcomb WH, Exline H, Hunter RC (1963) Spiders of the Arkansas cotton field. *Ann Entomol Soc Am* 56: 653–660.
159. Kosuge T, Sasaki T (2002) Predation of the freshwater crab *Geothelphusa minei*, by the spider, *Dolomedes raptor*. *Biol Mag (Okinawa)* 40: 51–52.
160. Lynch RJ, Bunn SE, Catterall CP (2002) Adult aquatic insects: potential contribution to riparian foodwebs in australia's wet-dry tropics. *Austral Ecol* 27: 515–526.
161. Sanzone DM, Meyer JL, Marti E, Gardner EP, Tank JL, et al. (2003) Carbon and nitrogen transfer from a desert stream to riparian predators. *Oecologia* 134: 238–250.
162. Greenwood M (2007) The population dynamics of a riparian spider: interactive effects of flow-related disturbance on cross-ecosystem subsidies and spider habitat. Ph.D. thesis, University of Canterbury, Christchurch, New Zealand.
163. Turnbull AL (1973) Ecology of the true spiders (Araneomorphae). *Annu Rev Entomol* 18: 305–348.
164. Dippenaar-Schoeman AS, Jocqué R (1997) African spiders, an identification manual. Pretoria: Plant Protection Research Institute Handbook 9, Agricultural Research Council. 392 p.
165. Berland L, Pellegrin J (1934) Sur une araignée pêcheuse de poissons. *B Soc Zool Fr* 59: 210–212.
166. Lapinski W, Tschapka M (2013) Habitat use in an assemblage of Central American wandering spiders. *J Arachnol* 41: 151–159.
167. Dudgeon D (1999) Tropical Asian streams: zoobenthos, ecology and conservation. Hong Kong: Hong Kong University Press. 844 p.
168. Akabane H (1995) A record of predation of fish by *Dolomedes palliarsis*. *Kishidaia* 69: 40–41 (in Japanese).
169. Mohrhardt D (1963) (Photograph of *Dolomedes scriptus* preying on minnow). *Turttox News* 41: 197.
170. Suhr JM, Davis JD (1974) The spider *Dolomedes sexpunctatus* as a predator on mosquitofish, *Gambusia affinis*, in Mississippi. *Ass Southeast Biol Bull* 21: 87.
171. Davis WT (1891) A spider fisherman. *Entomol News* 2: 77.
172. Zahl P (1971) What's so special about spiders? *Natl Geogr* 140: 190–219.
173. Adams W (1927) Note on a fishing spider. *Bull Zool Soc NY* 30: 77.
174. Romand R (1980) Die Schutzanpassung von *Aphyosemion walkeri* im Waldgebiet der Elfenbeinküste. *DATZ* 33: 262–264.
175. Crome W (1951) Die Wasserspinne. (Die Neue Brehm-Bücherei, Heft 44). Leipzig: Akademische Verlagsgesellschaft. 47 p.
176. Jäger P (2011) Revision of the genera *Nilus* O. Pickard-Cambridge 1876, *Sphedanus* Thorell 1877 and *Dendrolycosa* Doleschall 1859 (Araneae: Pisauridae). *Zootaxa* 3046: 1–38.
177. Ciancio J, Pascual M (2006) Energy density of freshwater Patagonian organisms. *Ecologia Austral* 16: 91–94.
178. Cummins KW (1967) Calorific equivalents for studies in ecological energetics. Second Edition. Pittsburgh: Pymatuning Laboratory of Ecology, University of Pittsburgh. 52 p.
179. Pandian TJ, Marian MP (1985) Time and energy costs of metamorphosis in the Indian bullfrog *Rana tigrina*. *Copeia* 3: 653–662.
180. Comita GW, Schindler DW (1963) Calorific values of microcrustacea. *Science* 140: 1394–1396.
181. Benoy GA, Nudds TD, Dunlop E (2002) Patterns of habitat and invertebrate diet overlap between tiger salamanders and ducks in prairie potholes. *Hydrobiologia* 481: 47–59.
182. Morante T, García-Arberas L, Antón Á, Rallo A (2012) Macroinvertebrate biomass estimates in Cantabrian streams and relationship with brown trout (*Salmo trutta*) populations. *Limnetica* 31: 85–94.
183. Staddon BW (1963) Water balance in the aquatic bugs *Notonecta glauca* L. and *Notonecta marmorea* Fabr. (Hemiptera: Heteroptera). *J Exp Biol* 40: 563–571.
184. Salonen K, Sarvala J, Hakala I, Viljanen ML (1976) The relation of energy and organic carbon in aquatic invertebrates. *Limnol Oceanogr* 21: 724–730.
185. Matthews PGD, Seymour RS (2011) Oxygen binding properties of backswimmer (Notonectidae, *Anisops*) haemoglobin, determined in vivo. *J Insect Physiol* 57: 1698–1706.
186. Needham KM (1990) Specific and seasonal variation in survival and sodium balance at low pH in five species of waterboatmen (Hemiptera: Corixidae). M.Sc. thesis, University of British Columbia, Vancouver, Canada.
187. Rueda L, Patel K, Axtell R, Stinner R (1990) Temperature-dependent development and survival rates of *Culex quinquefasciatus* Say and *Aedes aegypti* (Diptera: Culicidae). *J Med Entomol* 27: 892–898.
188. Krebs JR, Avery MI (1984) Chick growth and prey quality in the European bee-eater (*Merops apiaster*). *Oecologia* 64: 363–368.
